# Supplementary material for: Synthesis of chiral cyclohexanes and carbasugars by 6-exo-dig radical cyclisation reactions
Source: Beilstein J Org Chem. 2008 Nov 19;4:43. doi: 10.3762/bjoc.4.43 (PMC2605619; doi:10.3762/bjoc.4.43)
Supplement: File 1 — Experimental and Data [file Beilstein_J_Org_Chem-04-43-s001.doc]

# Experimental and Data

**Synthesis of chiral cyclohexanes and carbasugars by** 6‑***exo-dig* radical cyclisation reactions**

Rajeev K. Shrivastava*,1,2, Elise Maudru1, Gurdial Singh*,1,3, Richard H. Wightman4 and Keith M. Morgan4

Address: 1Department of Chemistry, University of Sunderland, Sunderland, SR1 3SD, UK, 2Sciences & PE Department, Natural and Applied Sciences Building, Edge Hill University, Ormskirk, L39 4QP, UK (present address), 3Department of Chemistry, The University of the West Indies, St. Augustine, Trinidad and Tobago (present address) and 4Department of Chemistry, Heriot-Watt University, Edinburgh, EH14 4AS, UK.

Email: Rajeev K. Shrivastava* - [Rajeev.Shrivastava@edgehill.ac.uk](mailto:Rajeev.Shrivastava@edgehill.ac.uk); Gurdial Singh* - [Gurdial.Singh@sta.uwi.edu](mailto:Gurdial.Singh@sta.uwi.edu)

* Corresponding author

**General**

IR spectra were recorded on a UNICAM research series FT-instrument. 1H NMR spectra were measured at 270 MHz with a JEOL GSX 270 FT NMR or at 400 MHz with a JEOL GX 400 FT NMR instrument. Chemical shifts were measured relative to internal tetramethylsilane (d = 0). 13C NMR spectra were recorded at 67.8 MHz or 100 MHz with d TMS = 0 as internal reference or the solvent as internal reference. CDCl3 was used to dissolve samples for the determination of NMR spectra unless otherwise stated. Melting points were measured on a Gallenkamp capillary melting point apparatus and are uncorrected. Specific rotations were measured in chloroform solution using a Bellingham & Stanley ADP 220 polarimeter and the values are given in 10-1 deg·cm2·g-1. Mass spectra and high-resolution mass spectra were carried out by the EPSRC National Mass Spectrometry Centre in the Department of Chemistry at the University of Wales, Swansea. Flash chromatography was carried out on Fluka silica gel 60 (230–400 mesh). Thin layer chromatography was carried out using pre-coated aluminium plates (Merck Kieselgel 60 F254) which were visualised under UV light and then using either acidic ammonium molybdate [ammonium molybdate(VI) tetrahydrate (25 g), conc. H2SO4 (50 ml) and water (450 ml)] or basic aqueous potassium permanganate [potassium permanganate (6 g), potassium carbonate (40 g), NaOH (0.5 g) and water (610 ml)] as appropriate. THF was distilled from sodium-benzophenone in a recycling still. Dichloromethane, toluene, benzene and pyridine were distilled from calcium hydride and stored over 3Å molecular sieves. Petroleum ether (boiling range 40–60 C) was distilled prior to use; other organic solvents and reagents were purified by standard methods. All anhydrous reactions were carried out in flame- or oven dried apparatus under argon or nitrogen atmosphere. Anhydrous transfers were carried out using standard syringe techniques.

**7-*O-tert*-Butyldiphenylsilyl-1,2-dideoxy-4,5-*O*-isopropylidene-1-phenyl-d-hept-1-ynitols (2a):** Phenylacetylene (13.21 g, 14.21 ml, 129.37 mmol) was dissolved in dry THF (60 ml) at −78 C under argon. To this solution *n*-BuLi (1.6 M in hexane, 72.8 ml, 116.43 mmol) was added and the mixture was stirred for 40 min. Following this 5-*O*-*tert*-butyldiphenylsilyl-2,3-*O*-isopropylidene-d-ribose (**1**)(11.07 g, 25.87 mmol) dissolved in dry THF (70 ml) was added dropwise over 20 min; maintaining the temperature at −78 C. The solution was stirred and allowed to warm up to room temperature and stirring continued for 12 h. The solvent was evaporated under reduced pressure and the residue was diluted with ethyl acetate (250 ml), washed with water (200 ml) and extracted with ethyl acetate (2 x 250 ml). The organic layers were combined, dried (Na2SO4), concentrated and purified by flash chromatography on silica gel using light petroleum/diethyl ether (2:1) as eluent to afford the title compound **2a** (12.18 g, 89%) as a colourless oil, [a]D 0 (*c* 1.2 in CHCl3); nmax(film)/cm-1 3413 (OH), 3072, 3018, 2958, 2934, 2877, 2854, 2228 (C≡C), 1646, 1598, 1490, 1463, 1428, 1382, 1317, 1216, 1112, 1072, 1008 and 946; dH (270 MHz) (mixture of diastereoisomers minor *altro*:major *allo* 1:2) 1.08 (3 H, s, minor CMe3), 1.09 (6 H, s, major CMe3), 1.35 (4 H, s, major CMe2), 1.37 (1 H, s, minor CMe2), 1.47 (1 H, s, minor CMe2), 3.19 (0.4 H, bs, minor OH), 3.21 (0.6 H, bs, major OH), 3.81 (1 H, m, major and minor C*H*HOSi), 3.94 (1 H, m, major and minor CH*H*OSi), 4.05 (1 H, m, major and minor C*H*CH2OSi), 4.20 (0.6 H, d, *J* 5.6 and 10.2, major and minor C*H*OR), 4.37 (0.4 H, d, *J* 5.9 major and 9.8, minor C*H*OR), 4.41 (0.8 H, d, *J* 9.9, major C*H*OR), 4.93 (0.2 H, d, *J* 5.8, minor C*H*OR), 5.30 (1 H, d, *J* 8.5, C≡C-C*H*(OH)), 7.29–7.36 (3 H, m, Ph), 7.39–7.46 (9 H, m, Ph), 7.65–7.70 (3 H, m, Ph); dC (67.8 MHz) (major, *allo*- diastereoisomer) 24.82 (1 C, *C*Me3), 25.44 (1 C, Me), 26.78 (3 C, *C*Me3), 27.61 (Me), 61.88, 65.14, 69.33, 76.53, 77.47 (5 C, CH2OSi, 2 x CHOR, 2 x CHOH), 85.51 and 87.76 (2C, carbon triple bond), 109.28 (*C*Me2), 122.64 (1 C, Ph), 127.76 (2 C, Ph), 127.80 (3 C, Ph), 127.84 (2 C, Ph), 128.13 (2 C, Ph), 128.21 (Ph), 128.35 (Ph), 131.88 (2 C, Ph), 135.45 (2 C, Ph), 135.51 (2 C, Ph) and unresolved; dC (67.8 MHz) (minor, *altro*- diastereoisomer) 24.65 (*C*Me3), 25.31 (1 C, Me), 26.73 (3 C, *C*Me3), 27.49 (Me), 61.82, 65.06, 69.27, 76.41, 77.36 (5 C, CH2OSi, 2 x CHOR, 2 x CHOH), 85.32 and 87.59 (2C, C≡C), 108.98 (*C*Me2), 121.96 (Ph), 127.43 (2 C, Ph), 127.28 (3 C, Ph), 127.59 (2 C, Ph), 128.23 (2 C, Ph), 128.12 (Ph), 128.23 (Ph), 131.76 (2 C, Ph), 134.48 (2 C, Ph), 134.49 (2 C, Ph); *m/z* (CI, NH3) 548 (M + NH4+), 531 (M+) 377 (M+−2Ph), 202, 157,143,78,58,52; [Found M + NH4+, 548.2830 C32H42O5NSi requires M + NH4+, 548.2832].

**7-*O*-*tert*-Butyldiphenylsilyl-1,2-dideoxy-4,5-*O*-isopropylidene-1-trimethylsilyl-d-hept-1-ynitols (2b) and 7-*O*-*tert*-butyldiphenylsilyl-1,2-dideoxy-4,5-*O*-isopropylidene-d-hept-1-ynitols (2c)**: In a 250 ml round bottom flask, dry THF (80 ml) was cooled to −78 C and trimethylsilylacetylene (6.2 ml, 43.71 mmol) was added, followed by *n*-BuLi (1.6 M in hexanes, 23.5 ml, 37.47 mmol). After 40 min, 5-*O*-*tert*-butyldiphenylsilyl-2,3-*O*-isopropylidene-,-d-ribofuranose (**1**) (5.34 g, 12.49 mmol) dissolved in dry THF (20 ml) was added to the mixture at −78 C *via* canula, and the mixture allowed to warm up to room temperature. After 12 h, the reaction mixture was concentrated and the residue was diluted in ethyl acetate (200 ml), washed with water (100 ml) and extracted with ethyl acetate (2 x 200 ml). The organic layers were combined, dried (Na2SO4), concentrated and purified by flash chromatography on silica gel using light petroleum/diethyl ether (3:1) as eluent to afford the title compounds **2b** (2.93 g, 45%) and **2c** (1.56 g, 28%) as yellowish oils.

*Rf* = 0.5 in light petroleum/diethyl ether (2:1) **2b**, []D −8.1 (*c* 17.95 in CHCl3); max(film)/cm-1 3392 (OH), 3072, 3050, 2958, 2933, 2896, 2859, 2177 (CC), 1589, 1471, 1427, 1380, 1249, 1218, 1168, 1112, 1068, 1008, 941, 844, 761; H (270 MHz) (mixture of diastereoisomers , as 1:3.6) 0.18 (9 H, s, major and minor SiMe3), 1.07 (7.2 H, s, major CMe3), 1.09 (1.8 H, s, minor CMe3), 1.32 (2.5 H, s, major Me), 1.33 (2.5 H, s, major Me), 1.44 (0.5 H, s, minor Me), 1.47 (0.5 H, s, minor Me), 3.07 (0.21 H, d, *J* 5.27, minor OH), 3.16 (0.64 H, d, *J* 3.96, major OH), 3.63–3.69 (0.22 H, dd, *J* 3.3 and 11.21, minor CH2OSi), 3.73–3.81 (1.82 H, dd, *J* 3.95 and 9.89, major CH2OSi), 3.88–3.99 (1.67 H, m, C*H*CH2OSi and major OH), 4.12–4.18 (0.73 H, dd, *J* 5.28 and 9.89, C*H*CHCH2OSi), 4.24–4.44 (1.57 H, m, major C*H*CHC, minor C*H*CHC and minor OH), 4.60–4.73 (1.25 H, m, major C*H*C), 5.33 (0.21 H, d, *J* 10.56, minor C*H*C), 7.33–7.47 (6.7 H, m, *meta-* and *para-*Ph), 7.64–7.69 (4.4 H, m, *ortho-*Ph); C (67.8 MHz) (major,  anomer) −0.06 (3 C, SiMe3), 19.29 (1C, *C*Me3), 25.40 (1 C, Me), 26.87 (3 C, C*Me3*), 27.52 (1 C, Me), 61.98, 65.32, 69.43, 76.40 and 80.13 (5 C, *C*H2 and 4 x CHOR), 87.15 and 90.62 (2 C, CC), 109.19 (1 C, *C*Me2), 127.77 (2 C, Ph), 127.80 (2 C, Ph), 127.85 (1 C, Ph), 129.90 (1 C, Ph), 129.94 (1 C, Ph), 132.99 (1 C, Ph), 135.52 (2 C, Ph), 135.57 (2 C, Ph); C (37.8 MHz) (minor,  anomer) 11.34 (3 C, SiMe3), 18.72 (1 C, *C*Me3), 24.93 (1 C, Me), 27.14 (3 C, C*Me3*), 29.04 (1 C, Me), 61.98, 65.51, 69.43, 76.60 and 79.14 (5 C, CH2, 4 x CHOR), 87.32 and 90.56 (2 C, CC), 104.30 (1 C, *C*Me2), 127.77 (1 C, Ph), 128.02 (1 C, Ph), 128.06 (2 C, Ph), 130.19 (1 C, Ph), 130.36 (1 C, Ph), 133.05 (1 C, Ph), 134.24 (1 C, Ph), 135.20 (1 C, Ph), 135.37 (1 C, Ph), 135.74 (2 C, Ph); *m/z* (CI, NH3) 544 (M + NH4+), 527 (MH+), 392, 313, 90. [Found M + NH4+ 544.2930. C29H46O5NSi2 requires 544.2915].

*Rf*= 0.26 in light petroleum/diethyl ether (2:1) **2c**, []D −9.5 (*c* 8.9 in CHCl3); max(film)/cm-1 3386 (OH), 3305 (CC-H), 3070, 3030, 2985, 2935, 2892, 2857, 1724, 1465, 1427, 1380, 1245, 1218, 1164, 1110, 1068, 871, 821; H (270 MHz)(mixture of diastereoisomers , as 1:1.8) 1.08 (9 H, s, major and minor CMe3), 1.31 (1.77 H, s, major Me), 1.33 (1.77 H, s, major Me), 1.35 (1.25 H, s, minor Me), 1.45 (1 H, s, minor Me), 2.47 (0.36 H, d, *J* 1.98, minor CC-H), 2.50 (0.66 H, d, *J* 1.98, major CC-H), 2.98 (0.43 H, d, *J* 5.28, minor OH), 3.28 (0.63 H, d, *J* 3.3, major OH), 3.44–3.54 (0.8 H, m, major C*H*HOSi), 3.73–3.83 (0.9 H, m, major CH*H*OSi), 3.88–3.93 (1.65 H, dt, *J* 3.3 and 10.56, major C*H*CH2OSi and major OH), 4.09–4.18 (1.1 H, m, minor OH, minor C*H*CH2OSi, minor C*H*CHCH2OSi), 4.26–4.31 (0.75 H, m, major C*H*CHCH2OSi), 4.37 (1 H, dd, *J* 3.3 and 6.6, major and minor C*H*CHCC), 4.65 (0.74 H, m, major C*H*CC), 4.76 (0.47 H, dt, *J* 2.64 and 9.24, minor C*H*C), 7.36–7.47 (6 H, m, *para-* and *meta-*Ph), 7.63–7.68 (4 H, m, *ortho-*Ph); *m/z* (CI, NH3) 472 (M + NH4+), 336, 319, 274, 196, 94 and 78. [Found M + H+ 455.2247. C26H35O5Si requires 455.2254].

**7-*O-tert*-Butyldiphenylsilyl-1,2-dideoxy-3,6-di-*O*-methoxymethyl-4,5-*O*-isopropylidene-1-phenyl-d-*allo*-hept-1-ynitol (3a)** **and 7-*O-tert*-butyldiphenylsilyl-1,2-dideoxy-3,6-di-*O*-methoxymethyl-4,5-*O*-isopropylidene-1-phenyl-d-*altro*-hept-1-ynitol (3b):**Compound **2a** (4.13 g, 7.8 mmol) was dissolved in DCM (50 ml) and cooled to 0 C. To this *N,N-*diisopropylethylamine (10.07 g, 13.58 ml, 78 mmol) was added, followed by chloromethylmethyl ether (6.24 g, 5.9 ml, 78 mmol). The mixture was allowed to warm to room temperature and stirred for 48 h. The solvent was evaporated and the residue was diluted with ethyl acetate (150 ml). The resultant solution was washed with water (100 ml) and the aqueous phase extracted with ethyl acetate (2 x 150 ml). The organic layers were combined, dried over Na2SO4 and concentrated. The residue was purified by flash chromatography on silica gel, using light petroleum/diethyl ether (6:1) as eluent to afford the two diastereoisomers **3a** (2.07 g, 43%) and **3b** (1.11 g, 23%) as colourless oils.

*More polar* **3a** *(anti product). Rf* = 0.30 in light petroleum/diethyl ether (3:1);[a]D +74.7 (*c* 0.5 in CHCl3);nmax (film)/cm-1 3073, 3052, 2988, 2937, 2887, 2858, 2824, 2238 (carbon triple bond), 1645, 1594, 1494, 1421, 1439, 1378, 1327, 1258, 1213, 1156, 1109, 1049 and 923; dH (270 MHz) 1.09 (9 H, s, CMe3), 1.35 (3 H, s, Me), 1.52 (3 H, s, Me), 3.39 (3 H, s, OMe),3.41 (3 H, s, OMe), 3.67 (1 H, dd, J 4.0 and 12.0, C*H*HOSi), 3.96 (1 H, dd, J 2.5 and 11.3, CH*H*OSi), 4.13–4.17 (1 H, m, C*H*CH2OSi), 4.39 (1 H, dd, *J* 2.5 and 7.1, C*H*CHC triple bond), 4.61 (1 H, dd, *J* 6.8 and 8.4, C*H*CHCH2), 4.75 (1 H, d, *J* 6.8, OCH*H*O), 4.81 (1 H, d, *J* 6.8, *OCH*H*O*), 4.83 (1 H, d, *J* 6.6, *OCH*H*O*), 4.98 (1 H, d, *J* 2.3, CHC triple bond), 5.07 (1 H, d, *J* 6.9, *OC*H*HO*), 7.38 (11 H, m, Ph), 7.68 (4 H, m, Ph); dC (67.8 MHz) 19.60 (1 C, *C*Me3), 25.13 (1 C, Me), 26.89 (1 C, Me), 26,96 (3 C, C*Me3*), 55.77 and 56.21 (2 C, 2 x O*Me*), 63.69 (1 C, CH2) 65.87, 74.39, 76.58 and 79.18 (4 C, 4 x *C*HOR), 87.88 and 88.89 (2 C, Carbon triple bond), 95.09 and 96.19 (2 C, 2 x O*C*H2O), 110.11 (1 C, *C*Me2), 127.71 (6 C, Ph), 129.75 (4 C, Ph), 133.30 (2 C, Ph) and 135.53 (6 C, Ph); *m/z* (CI, NH3) 636.6 (M + NH4+), 557.5 (M+ −Ph), 274.4 (-*tert*-butyldiphenylsilyl), 216.3, 196.3, 171.3, 169.3, 167.3 and 76.4 [Found: M + NH4+ 636.3360. C36H50O7NSi requires 636.3357].

*Less polar* **3b** *(syn product). Rf* = 0.44 in light petroleum/diethyl ether (3:1);[a]D −65.4 (*c* 0.6 in CHCl3); nmax (film)/cm-1 3074, 3053, 2992, 2943, 2887, 2859, 2825, 2230 (CC), 1645, 1592, 1494, 1471, 1439, 1376, 1328, 1254, 1210, 1108 and 1024; dH (270 MHz) 1.09 (9 H, s, CMe3), 1.35 (3 H, s, Me), 1.51 (3 H, s, Me), 3.30 (3 H, s, OMe),3.39 (3 H, s, OMe), 3.94 (2 H, m, C*H*2OSi), 4.19–4.21 (1 H, m, C*H*CH2OSi), 4.43 (1 H, d, *J* 6.2, C*H*CHC triple bond), 4.58 (1 H, d, *J* 6.2, C*H*CHCH2), 4.75 (3 H, m, C*H*C triple bond and OC*H*2O), 4.89 (1 H, d, *J* 6.9, *OCH*H*O*), 5.02 (1 H, d, *J* 6.3, *OC*H*HO*), 7.28–7.43 (12 H, m, Ph), 7.69–7.74 (3 H, m, Ph); dC (67.8 MHz) 19.57 (1 C, *C*Me3), 25.26 (1 C, Me), 26.76 (1 C, Me), 26,93 (3 C, C*Me3*), 55.78 and 55.93 (2 C, 2 x O*Me*), 64.48 (1 C, CH2) 65.78, 76.32, 76.94 and 78.33 (4 C, 4 x *C*HOR), 85.29 and 87.48 (2 C, Carbon triple bond), 95.03 and 96.38 (2 C, 2 x O*C*H2O), 109.78 (1 C, *C*Me2), 127.04 (2 C, Ph), 127.68 (2 C, Ph), 128.39 (1 C, Ph), 128.68 (2 C, Ph), 129.08 (2 C, Ph), 129.17 (1 C, Ph), 131.89 (2 C, Ph), 135.86 (2 C, Ph), 135.98 (2 C, Ph) and 136.06 (2 C, Ph); *m/z* (CI, NH3) 636.3 (M + NH4+) 557.3 (M+ − Ph), 274.2 (M+ -*tert*-butyldiphenylsilyl), 216(-OMOM), 196.1, 185.1, 169.1, 167.1, 157.1, 108.1 and 78.1 [Found: M + NH4+ 636.3360. C36H50O7NSi requires 636.3357].

**7-*O*-*tert*-Butyldiphenylsilyl-1,2-dideoxy-3,6-di-*O*-methoxymethyl-4,5-*O*-isopropylidene-1-trimethylsilyl-d-*allo*-hept-1-ynitol (4a) and 7-*O*-*tert*-butyldiphenylsilyl-1,2-dideoxy-3,6-di-*O*-methoxymethyl-4,5-*O*-isopropylidene-1-trimethylsilyl-d-*altro*-hept-1-ynitol (4b):** 7-*O*-*tert*-Butyldiphenylsilyl-1,2-dideoxy-4,5-*O*-isopropylidene-1-trimethylsilyl-d-hept-1-ynitols (**2b**, 1.871 g, 3.56 mmol) were dissolved in dry DCM (50 ml) and placed at 0 C. *N,N*-Diisopropylethylamine (4.6 g, 6.2 ml, 35. 6 mmol) was added followed by chloromethylmethyl ether (2.86 g, 2.7 ml, 35.8 mmol). The reaction mixture was left at 0 C for 20 min and warmed up to room temperature. After 48 h, the solvent was evaporated, the residue dissolved in ethyl acetate (100 ml), washed with water (75 ml) and extracted with ethyl acetate (2 x 100 ml), dried (Na2SO4), concentrated and the residue purified by flash chromatography on silica gel using light petroleum/diethyl ether (6:1) as eluent to afford the 2 diastereoisomers **4a** (1.099 g, 50%) and **4b** (0.303 g, 14%) as colourless oils.

*Rf* = 0.32 in light petroleum/diethyl ether (4:1) **4a**, []D +28.7 (*c* 6.75 in CHCl3); max(film)/cm-1 2956, 2933, 2892, 2857, 2823, 2175 (CC), 1589, 1471, 1428, 1378, 1251, 1214, 1151, 1105, 1037, 919, 844, 823, 759 and 742; H (270 MHz) 0.14 (9 H, s, SiMe3), 1.07 (9 H, s, C*Me3*), 1.37 (3 H, s, Me), 1.55 (3 H, s, Me), 3.38 (3 H, s, OMe), 3.40 (3 H, s, OMe), 3.83–3.89 (1 H, dd, *J* 3.96 and 11.22, C*H*HOSi), 4.01 (1 H, dd, *J* 1.98 and 11.21, CH*H*OSi), 4.16–4.21 (1 H, m, *J* 1.98, 2.64 and 9.24, C*H*CH2OSi), 4.43 (1 H, dd, *J* 1.97, 2.64 and 6.59, 7.26, C*H*CHCH2OSi), 4.51–4.57 (1 H, dd, *J* 7.26 and 8.57, C*H*CHC), 4.63 (1 H, d, *J* 6.59, OCH*H*O), 4.73 (1 H, d, *J* 1.98, C*H*C), 4.77 (1 H, d, *J* 6.6, OC*H*HO), 4.84 (1 H, d, *J* 7.26, OC*H*HO), 5.00 (1 H, d, *J* 6.6, OCH*H*O), 7.38–7.43 (6 H, m, *meta-* and *para-*Ph), 7.69–7.74 (4 H, m, *ortho-*Ph); C (67.8 MHz) −0.34 (3 C, SiMe3), 19.27 (1 C, *C*Me3), 24.87 (1 C, Me), 26.59 (1 C, Me), 26.78 (3 C, *Me* and C*Me3*), 55.69 and 56.20 (2 C, 2 x OMe), 63.50 (1 C, CH2), 65.75 (1 C, C*C*-TMS), 74.22, 76.39, 76.53 and 77.18 (4 C, 4 x CHOR), 78.80 (1 C, *C*C-TMS), 93.81 and 96.38 (2 C, 2 x O*C*H2O), 108.93 (1 C, *C*Me2), 127.55 (2 C, Ph), 127.64 (2 C, Ph), 129.59 (1 C, Ph), 129.64 (1 C, Ph), 133.43 (1 C, quat. Ph), 133.54 (1 C, quat. Ph), 135.66 (2 C, Ph) and 135.74 (2 C, Ph); *m/z* (CI, NH3) 632 (M + NH4+), 583, 553, 525, 463, 431, 197 and 90. [Found M + NH4+ 632.3440. C33H54NO7Si2 requires 632.3440].

*Rf* = 0.45 in light petroleum/diethyl ether (4:1) **4b**, []D −8.2 (*c* 17.6 in CHCl3); max(film)/cm-1 2958, 2933, 2892, 2857, 2823, 2173 (CC), 1589, 1471, 1428, 1378, 1251, 1214, 1153, 1112, 1039, 919, 846, 740; H (270 MHz) 0.17(9 H, s, SiMe3), 1.07 (9 H, s, CMe3), 1.35 (3 H, s, Me), 1.37 (3 H, s, Me), 3.35 (3 H, s, OMe), 3.38 (3 H, s, OMe), 3.92 (2 H, m, C*H2*OSi), 4.17 (1 H, q, *J* 3.3, C*H*CH2OSi), 4.34–4.39 (1 H, t, *J* 6.59, C*H*CHCH2OSi), 4.45–4.49 (2 H, dd, *J* 3.95 and 5.93, C*H*CHC and C*H*C), 4.62 (1 H, d, *J* 6.6, OC*H*HO), 4.75 (1 H, d, *J* 6.59, OCH*H*O), 4.83 (1 H, d, *J* 7.26, OC*H*HO), 4.92 (1 H, d, *J* 6.6, OCH*H*O), 7.38 (6 H, m, *para-* and *meta-*Ph), 7.69–7.73 (4 H, m, *ortho-*Ph); C (37.8 MHz) −0.31 (3 C, SiMe3), 19.26 (1 C, *C*Me3), 25.16 (1 C, Me), 26.52 (1 C, Me), 26.82 (3 C, C*Me3*), 55.77 and 55.85 (2 C, 2 x OMe), 64.48 (1 C, CH2OSi), 65.69 (1 C, C*C*-TMS), 73.55, 76.21, 76.37 and 77.24 (4 C, 4 x CHOR), 78.60 (1 C, *C*C-TMS), 94.32 and 96.69 (2 C, 2 x OCH2O), 108.93 (1 C, *C*Me2), 127.58 (2 C, Ph), 127.65 (3 C, Ph), 129.56 (1 C, Ph), 129.62 (1 C, Ph), 135.66 (3 C, Ph), 135.74 (2 C, Ph); *m/z* (CI, NH3) 632 (M + NH4+), 615, 583, 490, 463, 461, 234 and 90 [Found: M + NH4+ 632.3440. C33H54O7NSi2 requires 632.3440].

**7-*O*-*tert*-Butyldiphenylsilyl-1,2-dideoxy-3,6-di-*O*-methoxymethyl-4,5-*O*-isopropylidene-d-*allo*-hept-1-ynitol (5a) and 7-*O*-*tert*-butyldiphenylsilyl-1,2-dideoxy-3,6-di-*O*-methoxymethyl-4,5-*O*-isopropylidene-d-*altro*-hept-1-ynitol (5b):** 7-*O*-*tert*-butyldiphenylsilyl-1,2-dideoxy-4,5-*O*-isopropylidene-d-hept-1-ynitols (**2c**, 0.994 g, 2.190 mmol) were dissolved in dry DCM (15 ml) and placed at 0 C. *N,N*-Diisopropylethylamine (2.82 g, 3.8 ml, 21.8 mmol) was added, followed by chloromethylmethyl ether (1.8 g, 1.7 ml, 22.5 mmol) and after 20 min the reaction mixture was warmed to room temperature and left to stir for 48 h. The solvent was removed under reduced pressure, the residue was dissolved in ethyl acetate (100 ml), washed with water (70 ml) and extracted with ethyl acetate (2 x 100 ml). The organic layers were combined, dried (Na2SO4) and purified by flash chromatography on silica gel using light petroleum/diethyl ether (4:1) as eluent to yield two separable diastereoisomers **5a** (0.576 g, 49%) and **5b** (0.255 g, 21%) as colourless oils.

The most polar **5a**, []D −5.4 (*c* 8.1 in CHCl3); H (270 MHz) 1.07 (9 H, s, CMe3), 1.38 (3 H, s, Me), 1.54 (3 H, s, Me), 2.44 (1 H, d, *J* 1.98, CC-*H*), 3.38 (3 H, s, OMe), 3.39 (3 H, s, OMe), 3.85–3.90 (1 H, dd, *J* 3.3 and 11.21, C*H*HOSi), 3.99–4.04 (1 H, dd, *J* 1.98 and 11.21, CH*H*OSi), 4.11–4.15 (1 H, dt, *J* 2.64 and 8.57, C*H*CH2OSi), 4.42–4.45 (1 H, dd, *J* 2.64, 3.3 and 7.26, C*H*CHC), 4.54–4.60 (1 H, dd, *J* 7.26 and 8.57, C*H*CHCH2OSi), 4.63 (1 H, t, *J* 3.3, C*H*C), 4.74 (2 H, d, *J* 7.25, OC*H2*O), 4.84 (1 H, d, *J* 7.26, OC*H*HO), 4.99 (1 H, d, *J* 6.59, OCH*H*O), 7.34–7.42 (6 H, m, *meta-* and *para-*Ph), 7.64–7.71 (4 H, m, *ortho-*Ph); C (67.8 MHz) 19.29 (1 C, *C*Me3), 24.83 (1 C, Me), 26.55 (1 C, Me), 26.82 (3 C, C*Me3*), 55.83 and 56.24 (2 C, 2 x OMe), 63.44 (1 C, CH2OSi), 65.26 (1 C, C*C*-H), 74.34, 75.96, 76.22 and 76.43 (4 C, 4 x CHOR), 78.60(1 C, *C*C-H), 93.95 and 96.21 (2 C, 2 x O*C*H2O), 108.99 (1 C, *C*Me2), 127.58 (2 C, Ph), 127.65 (2 C, Ph), 129.62 (1 C, Ph), 129.67 (1 C, Ph), 129.78 (1 C, quat. Ph), 133.55 (1 C, quat. Ph), 135.68 (2 C, Ph), 135.74 (2 C, Ph); *m/z* (CI, NH3) 560 (M + NH4+), 511, 553, 389, 331, 78, 58 and 52. [Found M + NH4+ 560.3044. C30H46NO7Si requires 560.3044].

The less polar **5b**, H (270 MHz) 1.06 (9 H, s, CMe3), 1.36 (3 H, s, Me), 1.43 (3 H, s, Me), 2.48 (1 H, d, *J* 1.98, CC-*H*), 3.37 (3 H, s, OMe), 3.38 (3 H, s, OMe), 3.86–3.92 (1 H, dd, *J* 3.95 and 11.22, C*H*HOSi), 3.96–4.01 (1 H, dd, *J* 1.98, 2.64 and 11.87, CH*H*OSi), 4.08–4.12 (1 H, ddd, *J* 1.98, 4.62 and 7.26, C*H*CH2OSi), 4.37–4.40 (1 H, dd, *J* 4.62 and 5.93, C*H*CHC), 4.45–4.50 (1 H, t, *J* 7.25, C*H*CHCH2OSi), 4.61 (1 H, dd, *J* 1.98, 2.64 and 4.62, C*H*C), 4.65 (1 H, d, *J* 6.59, OC*H*HO), 4.73 (1 H, d, *J* 6.59, OCH*H*O), 4.86 (1 H, d, *J* 6.59, OC*H*HO), 4.96 (1 H, d, *J* 6.6, OCH*H*O), 7.30–7.44 (6 H, m, *para-* and *meta-*Ph) and 7.64–7.77 (4 H, m, *ortho-*Ph); C (67.8 MHz) 19.26 (1 C, *C*Me3), 25.31 (1 C, Me), 26.49 (1 C, Me), 26.81 (3 C, C*Me3*), 55.98 and 56.17 (2 C, 2 x OMe), 64.15 (1 C, *C*H2OSi), 65.20 (1 C, C*C*-H), 75.09, 75.55, 76.76 and 78.94 (4 C, 4 x CHOR), 80.27 (1 C, *C*C-H), 94.58 and 96.46 (2 C, 2 x O*C*H2O), 109.22 (1 C, *C*Me2), 127.59 (2 C, Ph), 127.65 (2 C, Ph), 129.61 (2 C, Ph), 133.46 (1 C, quat. Ph), 133.58 (1 C, quat. Ph), 135.68 (2 C, Ph) and 135.74 (2 C, Ph); *m/z* (CI, NH3) 560 (M + NH4+), 511, 553, 389, 331, 78, 58 and 52. [Found M + NH4+ 560.3044. C30H46NO7Si requires 560.3044].

**1,2-Dideoxy-3,6-di-*O*-methoxymethyl-4,5-*O*-isopropylidene-1-phenyl-d-*allo*-hept-1-ynitol (6a):** 7-*O*-*tert*-Butyldiphenylsilyl-1,2-dideoxy-3,6-di-*O*-methoxymethyl-4,5-*O*-isopropylidene-1-phenyl-d-*allo*-hept-1-ynitol (**3a**, 1.120 g, 1.813 mmol) was dissolved in dry THF (20 ml), to this was added TBAF (1 M in THF, 5.4 ml, 5.4 mmol). After 12 h, the solvent was evaporated, the residue was diluted in ethyl acetate (100 ml), washed with water (50 ml) and extracted with ethyl acetate (2 x 100 ml), the organic layers were combined, dried (Na2SO4) and concentrated. The residue was purified by flash chromatography on silica gel using light petroleum/diethyl ether (1:3) as eluent to afford the title compound **6a** (0.6 g, 87%) as a colourless oil, []D +125 (*c* 0.27 in CHCl3); max(film)/cm-1 3467 (OH), 2985, 2937, 2894, 2825, 2229 (CC), 1598, 1490, 1444, 1378, 1255, 1214, 1149, 1099, 1035, 917; H (270 MHz) 1.40 (3 H, s, Me), 1.53 (3 H, s, Me), 3.30–3.35 (1 H, dd, *J* 5.27 and 8.57, CH2O*H*), 3.43 (3 H, s, OMe), 3.46 (3 H, s, OMe), 3.63–3.72 (1 H, dt, *J* 5.28 and 12.21, C*H*HOH), 3.90–3.94 (1 H, ddd, *J* 2.64 and 8.58, CH*H*OH), 4.13–4.19 (1 H, dq, *J* 2.64 and 8.91, C*H*CH2OH), 4.25–4.31 (1 H, dd, *J* 6.92 and 8.91, CHOR), 4.48–4.51 (1 H, dd, *J* 2.64 and 6.93, CHOR), 4.70 (1 H, d, *J* 6.93, OC*H*HO), 4.80 (2 H, ab. q, *J* 7.26, OC*H2*O), 4.87 (1 H, d, *J* 2.64, C*H*C), 5.10 (1 H, d, *J* 6.93, OCH*H*O), 7.31–7.33 (3 H, m, *meta-* and *para-*Ph), 7.42–7.46 (2 H, m, *ortho-*Ph); C (67.8 MHz) 24.97 (1 C, Me), 26.80 (1 C, Me), 55.80 and 56.02 (2 C, 2 x OMe), 63.97(1 C, CH2), 65.34, 75.23, 78.88 and 79.98 (4 C, 4 x CHOR), 84.73 and 87.54 (2 C, CC), 93.83 and 97.07 (2 C, 2 x OCH2O), 109.31 (1 C, *C*Me2), 122.21 (1 C, Ph), 128.27 (2 C, Ph), 128.53 (1 C, Ph), 131.58 (2 C, Ph); *m/z* (CI, NH3) 398 (M + NH4+), 381 (M++ H), 320, 319 (M+ − OMOM), 287 and 261 [Found: M + NH4+ 398.2179. C20H32O7N requires 398.2179].

**1,2-Dideoxy-3,6-di-*O*-methoxymethyl-4,5-*O*-isopropylidene-1-phenyl-d-*altro*-hept-1-ynitol (6b):** 7**-***O*-*tert*-Butyldiphenylsilyl-1,2-dideoxy-3,6-di-*O*-methoxymethyl-4,5-*O*-isopropylidene-1-phenyl-d-*altro*-hept-1-ynitol (**3b**, 0.778 g, 1.26 mmol) was dissolved in dry THF (15 ml). TBAF (1 M in THF, 3.8 ml, 3.75 mmol) was added and this solution was stirred for 16 h at room temperature. The solvent was evaporated and the residue diluted in ethyl acetate (100 ml), washed with water (50 ml) and extracted with ethyl acetate (2 x 100 ml). The organic layers were combined, dried over Na2SO4 and concentrated to be purified by flash chromatography on silica gel using light petroleum/diethyl ether (1:1) as eluent to yield the title compound **6b** (0.437 g, 92%) as a colourless oil, []D −52 (*c* 0.12 in CHCl3); max(film)/cm-1 3463 (OH), 3058, 2985, 2937, 2892, 2825, 2225 (CC), 1298, 1490, 1444, 1380, 1253, 1216, 1151, 1079, 1033, 917; H (270 MHz) 1.40 (3 H, s, Me), 1.53 (3 H, s, Me), 3.24–3.29 (1 H, dd, *J* 4.62 and 8.91, CH2O*H*), 3.43 (3 H, s, OMe), 3.45 (3 H, s, OMe), 3.72–3.78 (1 H, ddd, *J* 4.62, 10.89 and 16.83, C*H*HOH), 3.87–3.92 (1 H, ddd, *J* 2.97 and 8.91, CH*H*OH), 4.16–4.21 (1 H, td, *J* 2.97 and 6.27, C*H*CH2OH), 4.30–4.35 (1 H, t, *J* 5.94, CHOR), 4.45–4.50 (1 H, t, *J* 5.94, CHOR), 4.70–4.78 (4 H, dd and d, *J* 2.31 and 6.93, C*H*C, OC*H2*O, OC*H*HO), 5.06 (1 H, d, *J* 6.59, OCH*H*O), 7.26–7.33 (3 H, m, *meta-* and *para-*Ph), 7.43–7.46 (2 H, m, *ortho-*Ph); C (67.8 MHz) 25.24 (1 C, Me), 26.85 (1 C, Me), 55.99 and 55.85 (2 C, 2 x OMe), 63.84 (1 C, CH2), 65.69, 77.11, 78.67 and 79.89 (4 C, 4 x CHOR), 85.01 and 87.42 (2 C, CC), 94.36 and 97.26 (2 C, 2 x O*C*H2O), 109.26 (1 C, *C*Me2), 122.23 (1 C, Ph), 128.27 (2 C, Ph), 128.63 (1 C, Ph), 131.73 (2 C, Ph); *m/z* (CI, NH3) 398 (M + NH4+), 381 (M++ H), 319 (M+ −OMOM), 287 and 261 [Found: M + NH4+ 398.2179. C20H32O7N requires 398.2179].

**7-Iodo-1,2,7-trideoxy-3,6-di-*O*-methoxymethyl-4,5-*O*-isopropylidene-1-phenyl-d-*allo*-hept-1-ynitol (7a):** To a solution of 1,2-dideoxy-3,6-di-*O*-methoxymethyl-4,5-*O*-isopropylidene-1-phenyl-d-*allo*-hept-1-ynitol (**6a**, 0.387 g, 1.015 mmol) in dry toluene (10 ml), triphenylphosphine (0.8 g, 3.046 mmol) and imidazole (0.21 g, 3.046 mmol) were added under vigorous stirring. The mixture was placed under reflux and iodine (0.56 g, 2.234 mmol) was added in small portions. After 2 h, the reaction mixture was cooled to room temperature and poured onto a saturated solution of sodium thiosulphate (20 ml) and extracted with ethyl acetate (3 x 50 ml). The organic layers were combined, dried over Na2SO4 and evaporated under reduced pressure. The residue was purified by flash chromatography on silica gel using light petroleum/diethyl ether (4:1) as eluent to afford the title compound **7a** (0.429 g, 86%) as a colourless oil, []D +87 (*c* 0.21 in CHCl3); max(film)/cm-1 3054, 2985, 2892, 2823, 2782, 2229 (CC), 1598, 1490, 1442, 1378, 1255, 1214, 1151, 1095, 1031; H (270 MHz) 1.42 (3 H, s, Me), 1.57 (3 H, s, Me), 3.42 (3 H, s, OMe), 3.52 (3 H, s, OMe), 3.56–3.61 (1 H, m, C*H*CH2I), 3.68–3.78 (2 H, m, CH2I), 4.31–4.37 (1 H, t, *J* 7.92 and 6.6, C*H*CHCH2I), 4.51 (1 H, dd, *J* 2.0, 2.63 and 7.25, C*H*CHC), 4.68 (1 H, d, *J* 7.26, OC*H*HO), 4.76–4.82 (2 H, t, *J* 7.26, OCH2O), 4.87 (1 H, d, *J* 2.64, C*H*C), 5.09 (1 H, d, *J* 7.26, OCH*H*O), 7.29–7.34 (3 H, m, *meta-* and *para-* Ph), 7.43 (2 H, m, *ortho-*Ph); C (67.8 MHz) 12.06 (1 , *C*H2I), 24.77 (1 , Me), 26.73 (1 , Me), 55.80 and 57.42 (2 , 2 x OMe), 65.63, 73.67, 77.47 and 78.54 (4 , 4 x CHOR), 84.89 and 87.79 (2 C, CC), 93.93 and 96.78 (2 C, 2 x OCH2O), 109.30 (1 C, *C*Me2), 122.36 (1 C, Ph), 128.37 (2 C, Ph), 128.66 (1 C, Ph), 131.72 (2 C, Ph); *m/z* (CI, NH3) 508 (M + NH4+), 461, 429. [Found: M + NH4+ 508.1196. C20H31O6NI requires 508.1196].

**7-Iodo-1,2,7-trideoxy-3,6-di-*O*-methoxymethyl-4,5-*O*-isopropylidene-1-phenyl-d-*altro*-hept-1-ynitol (7b):** To a solution of 1,2-dideoxy-3,6-di-*O*-methoxymethyl-4,5-*O*-isopropylidene-1-phenyl-d-*altro*-hept-1-ynitol (**6b**, 0.338 g, 0.886 mmol) in dry toluene (10 ml), triphenylphosphine (0.71 g, 2.657 mmol) and imidazole (0.20 g, 2.657 mmol) were added under vigorous stirring. The mixture was placed under reflux. Iodine (0.5 g, 1.95 mmol) was added in small portions. After 2 h, the reaction mixture was cooled and washed with a saturated solution of sodium thiosulphate (20 ml) and extracted with ethyl acetate (3 x 50 ml). The organic layers were combined, dried over Na2SO4, filtered and evaporated under reduced pressure, the residue was purified by flash chromatography on silica gel using light petroleum/diethyl ether (4:1) as eluent to afford the title compound **7b** (0.329 g, 76%) as a colourless oil, []D −57 (*c* 0.32 in CHCl3); max(film)/cm-1 3056, 2985, 2938, 2892, 2825, 2782, 2225, 1598, 1490, 1371, 1249, 1216, 1151, 1078, 1060 and 919; H (270 MHz) 1.42 (3 H, s, Me), 1.53 (3 H, s, Me), 3.44 (3 H, s, OMe), 3.50 (3 H, s, OMe), 3.58–3.62 (1 H, dd, *J* 3.29 and 10.55, C*H*HI), 3.65–3.70 (1 H, dd, *J* 2.97 and 13.86, CH*H*I), 3.8 (1 H, dt, *J* 2.97 and 7.26, C*H*CH2I), 4.31–4.36 (1 H, t, *J* 5.94, CHOR), 4.44 (1 H, t, *J* 5.61, CHOR), 4.69–4.72 (3 H, m, *J* 5.61, C*H*C and OC*H2*O), 4.83 (1 H, d, *J* 7.26, OC*H*HO), 5.10 (1 H, d, *J* 6.6, OCH*H*O), 7.31 (3 H, m, *meta-* and *para-*Ph), 7.45 (2 H, m, *ortho-*Ph); C (67.8 MHz) 11.61 (1 C, CH2I), 25.11 (1 C, Me), 26.88 (1 C, Me), 56.01 and 57.12 (2 C, 2 x OMe), 66.01, 74.52, 78.24 and 78.42 (4 C, 4 x CHOR), 85.12 and 87.50 (2 C, CC), 94.30 and 97.34 (2 C, 2 x O*C*H2O), 109.13 (1 C, *C*Me2), 122.32 (1 C, Ph), 128.32 (2 C, Ph), 128.66 (1 C, Ph), 131.76 (2 C, Ph); *m/z* (CI, NH3) 508 (M + NH4+), 303, 132. [Found M + NH4+, 508.1196. C20H31O6NI requires 508.1196].

**1,2-Dideoxy-3,6-di-*O*-methoxymethyl-4,5-*O*-isopropylidene-d-*allo*-hept-1-ynitol (8a):** 7-*O*-*tert*-Butyldiphenylsilyl-3,6-di-*O*-methoxymethyl-4,5-*O*-isopropylidene-1-trimethylsilyl-d-*allo*-hept-1-ynitol (**4a**, 0.793 g, 1.284 mmol) was dissolved in dry THF (20 ml) at room temperature. TBAF (1 M in THF, 6.4 ml, 6.42 mmol) was added. After 12 h, the reaction mixture was concentrated, the residue was dissolved in ethyl acetate (50 ml), washed with water (25 ml) and extracted with ethyl acetate (2 x 50 ml), the organic layers were combined, dried over Na2SO4, and purified by flash chromatography on silica gel with light petroleum/diethyl ether (1:3) as eluent to afford the title compound **8a** (0.373 g, 96%) as a colourless oil, []D +108 (*c* 3.42 in CHCl3); max(film)/cm-1 3467 (OH), 3262 (CC-H), 2985, 2938, 2896, 2827, 2113 (CC), 1457, 1376, 1257, 1214, 1149, 1079, 1037, 917, 890, 844, 755; H (270 MHz) 1.38 (3 H, s, Me), 1.55 (3 H, s, Me), 2.52 (1 H, d, *J* 1.98, CC-H), 3.33–3.38 (1 H, m, OH), 3.40 (3 H, s, OMe), 3.46 (3 H, s, OMe), 3.62–3.70 (1 H, m, C*H*HOH), 3.88–3.97 (1 H, qd, *J* 2.64, 8.58 and 11.22, CH*H*OH), 4.06–4.12 (1 H, ddd, *J* 2.64, 5.28 and 8.58, C*H*CH2OH), 4.20–4.26 (1 H, dd, *J* 6.6 and 8.58, CHOR), 4.38–4.41 (1 H, dd, *J* 2.64 and 6.59, CHOR), 4.65 (2 H, m, *J* 6.6, C*H*C and OC*H*HO), 4.73–4.81 (2 H, dd, *J* 6.6 and 12.54, OC*H2*O), 5.00 (1 H, d, *J* 6.6, OCH*H*O); C (67.8 MHz) 24.97 (1 C, Me), 26.81 (1 C, Me), 56.00 and 56.11 (2 C, 2 x OMe), 64.00 (1 C, *C*H2OH), 64.91 (1 C, C*C*-H), 75.43, 76.18, 78.59 and 79.63 (4 C, 4 x CHOR), 79.81 (1 C, *C*C-H), 94.04 and 97.19 (2 C, 2 x O*C*H2O) and 109.30 (1 C, *C*Me2); *m/z* (CI, NH3) 322 (M++ NH4+), 290 (M+ − Me), 273 (-HO), 246, 241, 229, 215 and 204. [Found: MH+ 305.1601. C14H25O7 requires MH, 305.1600].

**1,2-Dideoxy-3,6-di-*O*-methoxymethyl-4,5-*O*-isopropylidene-d-*altro*-hept-1-ynitol (8b):** 7-*O*-*tert*-Butyldiphenylsilyl-1,2-dideoxy-3,6-di-*O*-methoxymethyl-4,5-*O*-isopropylidene-1-trimethylsilyl-d-*altro*-hept-1-ynitol (**4b**, 0.241 g, 0.39 mmol) was dissolved in dry THF (15 ml) at room temperature. TBAF (1 M in THF, 1.9 ml, 1.95 mmol) was added. After 12 h, the reaction mixture was washed with water (10 ml) and extracted with ethyl acetate (3 x 50 ml). The organic layers were combined, dried over Na2SO4, concentrated and the residue was purified by flash chromatography on silica gel using light petroleum/diethyl ether (1:3) as eluent to yield the title compound **8b** (0.108 g, 91%) as a colourless oil, []D −48.7 (*c* 0.66 in CHCl3); max(film)/cm-1 3463 (OH), 3262 (CC-H), 2985, 2938, 2896, 2827, 2113 (CC), 1461, 1376, 1249, 1218, 1153, 1079, 1033, 917, 883, 740; H (270 MHz) 1.38 (3 H, s, Me), 1.51 (3 H, s, Me), 1.71 (1 H, bs, OH), 2.52 (1 H, d, *J* 2.14, CC-H), 3.43 (3 H, s, OMe), 3.46 (3 H, s, OMe), 3.65–3.73 (1 H, ddd, *J* 4.62, 6.02 and 12.29, C*H*HOH), 3.85–3.94 (1 H, ddd, *J* 2.81, 8.74 and 11.79, CH*H*OH), 4.01–4.08 (1 H, ddd, *J* 2.8, 6.27 and 7.92, C*H*CH2OH), 4.23–4.28 (1 H, dd, *J* 6.1 and 7.84, CHOR), 4.38 (1 H, t, *J* 6.02, CHOR), 4.52 (1 H, dd, *J* 2.14 and 5.28, C*H*C), 4.67–4.78 (3 H, m, OC*H2*O, OC*H*HO), 5.00 (1 H, d, *J* 6.76, OCH*H*O); C (67.8 MHz) 25.26 (1 C, Me), 26.71 (1 C, Me), 55.97 and 56.19 (2 C, 2 x OMe), 63.84 (1 C, *C*H2OH), 64.93 (1 C, C*C*-H), 75.46, 76.43, 76.93, 78.65 (4 C, 4 x CHOR), 79.97 (1 C, *C*C-H), 94.39 and 97.11 (2 C, 2 x OCH2O), 109.48 (1 C, *C*Me2); *m/z* (EI) 305 (M+ + H+), 290 (M+−Me), 273 (-HO), 241, 229, 215, 186, 109 and 58. [Found: MH+ 305.1600. C14H25O7 requires 305.1600].

**7-Iodo-1,2,7-trideoxy-3,6-di-*O*-methoxymethyl-4,5-*O*-isopropylidene-d-*allo*-hept-1-ynitol (9a):** A solution of 1,2-dideoxy-3,6-di-*O*-methoxymethyl-4,5-*O*-isopropylidene-d-*allo*-hept-1-ynitol (**8a**, 0.267 g, 0.882 mmol) in dry toluene (20 ml) was placed under reflux. Triphenylphosphine (0.7 g, 2.645 mmol) and imidazole (0.2 g, 2.645 mmol) were added under vigorous stirring. When the temperature of reflux was reached, iodine (0.5 g, 1.94 mmol) was added. After 2 h, the reaction mixture was cooled, poured onto a saturated solution of sodium thiosulphate (30 ml) and the residue was extracted with ethyl acetate (3 x 40 ml). The organic layers were combined, dried (Na2SO4), concentrated and purified by flash chromatography on silica gel using light petroleum/diethyl ether (3:1) to afford the title compound **9a** (0.267g, 73%) as a colourless oil, []D +35 (*c* 16.3 in CHCl3); max(film)/cm-1 3270 (CC-H), 2985, 2938, 2896, 2827, 2117 (CC), 1446, 1376, 1257, 1214, 1153, 1095, 1045, 917, 890 and 848; H (270 MHz) 1.39 (3 H, s, Me), 1.54 (3 H, s, Me), 2.59 (1 H, d, *J* 2.64, CC-H), 3.38 (3 H, s, OMe), 3.50 (3 H, s, OMe), 3.54–3.62 (2 H, m, C*H2*I), 3.66–3.72 (1 H, m, C*H*CH2I), 4.25–4.31 (1 H, t, *J* 6.59, CHOR), 4.38–4.42 (1 H, dd, *J* 2.64 and 6.59, CHOR), 4.64 (2 H, m, OC*H*HO and C*H*C), 4.72–4.78 (2 H, dd, *J* 7.25 and 9.89, OC*H2*O), 4.98 (1 H, d, *J* 6.59, OCH*H*O); C (67.8 MHz) 11.46 (1 C, CH2I), 24.35 (1 C, Me), 26.26 (1 C, Me), 55.43 and 56.98 (2 C, 2 x OMe), 64.52 (1 C, C*C*-H), 72.91, 76.49, 77.44 and 77.70 (4 C, 4 x CHOR), 79.19 (1 C, *C*C-H), 93.45 and 96.24 (2 C, 2 x O*C*H2O), 108.67 (1 C, *C*Me2); *m/z* (CI, NH3) 432 (M+ + NH3), 415 (M+ + H), 383, 306, 244, 213 and 183. [Found: M + H+ 415.0617. C14H24O6I requires 415.0617].

**7-Iodo-1,2,7-trideoxy-3,6-di-*O*-methoxymethyl-4,5-*O*-isopropylidene-d-*altro*-hept-1-ynitol (9b):** Triphenylphosphine (0.13 g, 0.711 mmol) and imidazole (0.075 g, 0.711 mmol) were added to a vigorously stirred solution of 1,2-dideoxy-3,6-di-*O*-methoxymethyl-4,5-*O*-isopropylidene-d-*altro*-hept-1-ynitol (**8b**, 0.072 g, 0.237 mmol) in dry toluene (10 ml), placed under reflux and iodine (0.13 g, 0.521 mmol) was added. After 2 h, the reaction mixture was directly poured onto a saturated solution of sodium thiosulphate (30 ml) and extracted with ethyl acetate (3 x 40 ml). The organic layers were combined, dried over Na2SO4, concentrated and purified by flash chromatography on silica gel using light petroleum/diethyl ether (3:1) to afford the title compound **9b** (0.076 g, 78%) as a white crystalline solid, mp 58–59 C, []D −49 (*c* 0.66 in CHCl3); max(film)/cm-1 3274 (CC-H), 2985, 2935, 2892, 2827, 2117 (CC), 1461, 1403, 1376, 1249, 1218, 1153, 1091, 1041, 917, 887 and 860; H (270 MHz) 1.36 (3 H, s, Me), 1.46 (3 H, s, Me), 2.50 (1 H, d, *J* 1.97, CC-*H*), 3.38 (3 H, s, OMe), 3.46 (3 H, s, OMe), 3.50–3.64 (3 H, m, C*H2*I and C*H*CH2I), 4.20–4.25 (1 H, bt, *J* 5.93, CHOR), 4.30–4.34 (1 H, t, *J* 5.94, CHOR), 4.49 (1 H, dd, *J* 1.98, 2.63 and 4.61, C*H*C), 4.64 (1 H, d, *J* 6.6, OC*H*HO), 4.67–4.76 (2 H, q, *J* 7.25, OC*H2*O), 4.94 (1 H, d, *J* 6.59, OCH*H*O); C (67.8 MHz) 11.38 (1 C, CH2I), 25.06 (1 C, Me), 26.64 (1 C, Me), 56.08 and 57.08 (2 C, 2 x OMe), 65.20 (1 C, C*C*-H), 73.91, 75.49, 77.99 and 78.18 (4 C, 4 x CHOR), 79.77 (1 C, *C*C-H), 94.33 and 96.84 (2 C, 2 x O*C*H2O), 109.17 (1 C, *C*Me2); *m/z* (CI, NH3) 432 (M+ +NH3), 415 (M+ +H), 307, 295, 279, 246, 227, 197, 188 and 170 [Found: M + NH4+ 414.0883. C14H27O6NI requires 432.0883]; (Found: C, 40.71; H, 5.68. C14H23O6I requires C, 40.59; H, 5.60%).

**(2*S*,3*S*,4*R*,5*R*)-1-Benzylidene-3,4-(isopropylidenedioxy)-2,5-bis(methoxymethoxy)cyclohexane (10):** 7-Iodo-1,2,7-trideoxy-3,6-di-*O*-methoxymethyl-4,5-*O*-isopropylidene-1-phenyl-d-*allo*-hept-1-ynitol (**7a**, 0.353 g, 0.717 mmol) was dissolved in dry benzene (15 ml) and the solution was degassed with argon for 1 h at room temperature. At the same time, a solution of AIBN (0.012 g, 0.07 mmol) in dry benzene (5 ml) was also degassed with argon at room temperature. The solution of the iodo compound **7a** was placed under a vigorous reflux (80 C). Tributyltin hydride (0.5 equiv, 0.1ml, 0.359 mmol) was added to the solution of AIBN which was added to the solution of the iodo compound **7a** *via* a double-tipped needle. After 15 min under reflux, another portion of tributyltin hydride (0.12 ml, 0.446 mmol) in benzene (10 ml) was added to the reaction mixture. After 1 h, the solution was cooled to room temperature, washed with petroleum (50 ml) and extracted with acetonitrile (2 x 100 ml). The acetonitrile layers were combined, concentrated and purified by flash chromatography on silica gel using light petroleum/diethyl ether (3:1) as eluent and filtered through silica gel with diethyl ether to yield the title compound **10** as a mixture of two inseparable isomers, **10** (0.242 g, 93%) which is a colourless oil, []D −172 (*c* 6.7 in CHCl3); max(film)/cm-1 2985, 2935, 2846, 1735, 1600 (C=C), 1450, 1376, 1261, 1214, 1149, 1103, 987, 917 and 867; H (270 MHz) (mixture of isomers, *E*:*Z* as 1:1.6) 1.36 (1.73 H, s, major Me), 1.38 (1.27 H, s, minor Me), 1.40 (1.73 H, s, major Me), 1.47 (1.27 H, s, minor Me), 2.61–2.77 (0.44 H, tdd, *J* 1.31, 1.98, 9.89 and 25.72, minor CH2), 2.79–2.94 (1.56 H, td, *J* 1.98, 7.91 and 23.75, major CH2), 3.21 (1.1 H, s, major OMe), 3.39 and 3.42 (3 H, 2s, minor 2 x OMe), 3.43 (1.9 H, s, major OMe), 4.14 (0.6 H, d, *J* 3.3, major C*H*CH2), 4.34–4.43 (1.38 H, qd, *J* 3.3, 5.94 and 12.54, minor C*H*CH2 and major C*H*CHCH2), 4.43 (1.54 H, m, *J* 2.64, 3.3 and 5.94, major C*H*CHC= and minor C*H*CHC=, minor C*H*CHCH2), 4.57 (0.9 H, m, 2 x minor OC*H2*O), 4.61 (0.7 H, dd, *J* 1.98, 2.64 and 7.26, major C*H*C=), 4.70–4.73 (0.53 H, dd, *J* 3.3, 2.63 and 5.94, 5.27, minor C*H*C=), 4.74 (2.58 H, m, 2 x major OC*H2*O), 6.50 (0.63 H, t, *J* 1.98 and 2.63, major C=C*H*Ph), 6.72 (0.39 H, t, J 1.98, minor C=C*H*Ph), 7.20–7.36 (5.22 H, m, Ph); C (67.8 MHz)(major, *Z* isomer) 24.57 (1 C, Me), 26.33 (1 C, Me), 28.38 (1 C, CH2), 55.30 (2 C, 2 x OMe), 70.98, 74.95, 76.53 and 78.47 (4 C, 4 x CHOR), 93.19 and 93.90 (2 C, 2 x O*C*H2O), 109.57 (1 C, *C*Me2), 126.86 (2 C, Ph), 128.13 and 128.54 (2 C, C=C), 130.83 (2 C, Ph), 132.12 (1 C, Ph), 136.56 (1 C, Ph); (minor, *E* isomer) 24.36 (1 C, Me), 26.16 (1 C, Me), 31.12 (1 C, CH2), 55.30 (2 C, 2 x OMe), 70.61, 75.12, 77.20, 77.47 (4 C, 4 x CHOR), 95.59 (2 C, 2 x O*C*H2O), 109.68 (1 C, *C*Me2), 126.61 (2 C, Ph), 128.00 and 128.75 (2 C, C=C), 131.79 (2 C, Ph), 132.86 (1 C, Ph), 136.49 (1 C, Ph); *m/z* (EI) 365 (MH+), 333, 303, 262. [Found MH+ 365.1964. C20H29O6 requires 365.1964].

**(1*Z*,2*R*,3*S*,4*R*,5*R*)-1-Benzylidene-3,4-(isopropylidenedioxy)-2,5-bis(methoxymethoxy)­cyclohexane (11) and (1*E*,2*R*,3*S*,4*R*,5*R*)-1-benzylidene-3,4-(isopropylidenedioxy)-2,5-bis­(methoxymethoxy)­cyclohexane (12):** 7-Iodo-1,2,7-trideoxy-3,6-di-*O*-methoxymethyl-4,5-*O*-isopropylidene-1-phenyl-d-*altro*-hept-1-ynitol (**7b**, 0.338 g, 0.774 mmol) was dissolved in dry benzene (10 ml) and degassed with argon for 1 h and placed under reflux. At the same time, a solution of AIBN (0.013 g, 0.077mmol) in dry benzene (5 ml) was also degassed with argon. Tributyltin hydride (0.3 ml, 1.0 mmol) was added to the solution of AIBN which was added to the solution of the iodo compound **7b** *via* a double-tipped needle. After 5 h, another solution of AIBN in benzene was added and after 30 min, the reaction was finished and allowed to cool to room temperature. The mixture was washed with petroleum (30 ml) and extracted with acetonitrile (3 x 50 ml). The acetonitrile layers were combined and concentrated to be purified by flash chromatography on silica gel using light petroleum/diethyl ether (2:1) as eluent to yield the two separable isomers **11** (0.094 g, 34%) and **12** (0.076 g, 27%), both as colourless oils.

*Rf* = 0.49 in light petroleum/diethyl ether (2:1) **11**, []D −31 (*c* 2.79 in CHCl3); max(film)/cm-1 2923, 1727, 1600 (C=C), 1461, 1376, 1249, 1214, 1149, 1106, 1033, 991, 917; H (270 MHz) 1.42 (3 H, s, Me), 1.64 (3 H, s, Me), 2.36–2.43 (1 H, dd, *J* 5.27, 5.94 and 12.53, C*H*HC=C), 2.88–2.97 (1 H, td, *J* 1.32, 11.88 and 12.53, CH*H*C=C), 3.25 (3 H, s, OMe), 3.45 (3 H, s, OMe), 3.84–3.92 (1 H, dt, *J* 5.28, 4.61 and 11.87, CH2C*H*OMOM), 4.20 (1 H, t, *J* 5.28, C*H*CHCH2), 4.40 (1 H, d, *J* 7.25, OC*H*HO), 4.49 (1 H, d, *J* 6.6, OCH*H*O), 4.54 (1 H, t, *J* 5.28 and 4.61, C*H*CHC=), 4.61 (1 H, d, *J* 5.28, C*H*C=), 4.78–4.86 (2 H, dd ab, *J* 6.59 and 7.26, OC*H2*O), 6.60 (1 H, s, C=C*H*Ph), 7.19–7.32 (5 H, m, Ph); C (67.8 MHz) 25.54 (1 C, Me), 25.65 (1 C, Me), 32.30 (1 C, CH2), 55.30 and 55.55 (2 C, 2 x OMe), 69.73, 73.76, 74.86 and 76.04 (4 C, 4x CHOR), 94.34 and 95.49 (2 C, 2 x O*C*H2O), 110.23 (1 C, *C*Me2), 126.99 (2 C, Ph), 128.10 and 128.42 (2 C, C=C), 130.86 (2 C, Ph), 134.34 (1 C, Ph) and 136.25 (1 C, Ph); *m/z* (CI, NH3) 382 (M + NH4+), 365 (MH+), 320, 303 and 264. [Found MH+ 365.1962. C20H29O6 requires 365.1964].

*Rf* = 0.26 in light petroleum/diethyl ether (2:1) **12**, []D −70.5 (*c* 2.10 in CHCl3); max(film)/cm-1 3054, 2927, 1727, 1658, 1600 (C=C), 1492, 1454, 1376, 1214, 1149, 1106, 1037, 987, 956, 917 and 871; H (270 MHz) 1.26 (3 H, s, Me), 1.43 (3 H, s, Me), 2.91 (2 H, dt, *J* 9.23 and 1.31, CH2), 3.41 (3 H, s, OMe), 3.47 (3 H, s, OMe), 4.00–4.09 (1 H, td, *J* 1.98, 2.64 and 9.89, MOMOC*H*CH2), 4.36–4.42 (1 H, m, *J* 2.64, 4.62 and 9.89, C*H*CHOMOMCH2), 4.57 (1 H, d, *J* 2.64, C*H*CHOMOMC=), 4.61 (1 H, t, *J* 3.3, OC*H*HO), 4.64–4.68 (1 H, dd, *J* 1.98, 2.64 and 7.91, C*H*OMOMC=), 4.73 (1 H, s, OCH*H*O), 4.76–4.83 (2 H, dd ab, *J* 3.3, 6.6 and 11.87, OCH2O), 6.60 (1 H, dd, *J* 2.64 and 4.62, C=C*H*Ph), 7.13–7.54 (5 H, m, Ph); C (67.8 MHz) 24.32 (1 C, Me), 25.80 (1 C, Me), 26.63 (1 C, CH2), 55.48 and 55.78 (2 C, 2 x OMe), 69.72, 73.94, 75.22 and 75.47 (4 C, 4 x CHOR), 95.17 and 95.50 (2 C, 2 x O*C*H2O), 110.03 (1 C, *C*Me2), 124.46 (2 C, Ph), 126.41 (2 C, Ph), 128.17 and 128.69 (2 C, C=C), 131.84 (1 C, Ph) and 137.26 (1 C, Ph); *m/z* (CI, NH3) 382 (M + NH4+), 365 (MH+), 320, 303 and 264. [Found MH+ 365.1960. C20H29O6 requires 365.1964].

**(2*R*,3*S*,4*R*,5*R*)-1-Methylidene-3,4-(isopropylidenedioxy)-2,5-bis(methoxymethoxy)cyclohexane (13) and (3*S*,4*R*,5*R*)-3,4-(isopropylidenedioxy)-5-(methoxymethoxy)-1-methylcyclohexene (14):** 7-Iodo-1,2,7-trideoxy-3,6-di-*O*-methoxymethyl-4,5-*O*-isopropylidene-d-*altro*-hept-1-ynitol **(9b**, 0.165 g, 0.397 mmol) was dissolved in dry benzene (10 ml) and the solution was degassed with argon and after 30 min placed under reflux. Tributyltin hydride (0.12 ml, 0.437 mmol) and AIBN (as catalyst) were added. After 30 min, tributyltin hydride (0.1 ml, 0.437 mmol) was dissolved in dry benzene (5 ml) and added very slowly to the reaction mixture over 20 min. After 2 h, the reaction mixture was cooled to room temperature, washed with light petroleum (40 ml) and extracted with acetonitrile (2 x 50 ml). The acetonitrile layers were combined and concentrated to be purified by flash chromatography on silica gel using light petroleum/diethyl ether (3:1) as eluent to afford the title compounds as 2 separable colourless oils **13** (0.044 g, 38%) and **14** (0.044 g, 49%).

**13**, *Rf* = 0.55 in light petroleum:diethyl ether 1:2, []D −83.4 (*c* 0.86 in CHCl3); max(film)/cm-1 3077 (R2C=CH2), 2931, 2823, 1654 (C=C), 1446, 1380, 1261, 1214, 1149, 1106, 1037 and 917; H (270 MHz) 1.37 (3 H, s, Me), 1.50 (3 H, s, Me), 2.46–2.70 (2 H, m, C*H2*), 3.38 (3 H, s, OMe), 3.40 (3 H, s, OMe), 4.02–4.07 (1 H, m, CH2C*H*OMOM), 4.13–4.19 (2 H, dd, *J* 5.28, 5.94 and 11.21, C*H*CH(OMOM)CH2 and C*H*CH(OMOM)C=), 4.47–4.50 (1 H, dd, *J* 2.64, 3.3 and 5.93, C*H*(OMOM)C=), 4.60–4.69 (2 H, 2d, *J* 6.59, OC*H2*O), 4.71–4.78 (2 H, m, OCH2O), 5.09 (2 H, d, *J* 11.21, C=CH2); C (67.8 MHz) 25.25 (1 C, Me), 26.99 (1 C, Me), 31.61 (1 C, CH2), 55.45 (2 C, 2 x OMe), 72.20, 75.52, 76.72 and 78.67 (4 C, 4 x CHOR), 93.89 and 95.65 (2 C, 2 x O*C*H2O), 109.60 (1 C, *C*Me2), 114.29 and 139.67 (2 C, C=C); *m/z* (EI) 289 (MH+), 257, 246 and 188. [Found: M+H+ 289.1651. C14H25O6 requires 289.1651].

**14,** *Rf* = 0.6 in light petroleum:diethyl ether 1:2, max(film)/cm-1 2985, 2927, 1673 (C=C in a ring), 1442, 1376, 1222, 1149, 1106, 1072, 1037, 917, 875 and 755; H (270 MHz) 1.39 (6 H, s, and 2 x Me), 1.73 (3 H, s, =C-C*H3*), 2.09–2.16 (1 H, dd, *J* 5.28 and 15.84, C*H*HC(Me)C=), 2.33–2.43 (1 H, bt, *J* 9.89 and 15.83, CH*H*C(Me)C=), 3.42 (3 H, s, OMe), 3.82–3.88 (1 H, ddd, *J* 2.64, 5.28 and 9.9, C*H*OMOM), 4.42 (1 H, d, *J* 3.3, CHOR), 4.60 (1 H, bs, CHOR), 4.74–4.80 (2 H, 2 x d, *J* 6.6 and 7.25, OC*H2*O), 5.33 (1 H, s, C*H*C=); C (67.8 MHz) 23.34 (1 C, =C*Me*), 26.79 (1 C, Me), 27.66 (1 C, Me), 30.70 (1 C, *C*H2), 55.40 (1 C, OMe), 72.78, 74.28 and 74.51 (3 C, 3 x CHOR), 95.23 (1 C, O*C*H2O), 109.48 (1 C, *C*Me2), 120.62 and 134.65 (2 C, C=C); *m/z* (CI, NH3) 246 (M + NH4+), 229 and 188. [Found: M + NH4+ 246.1705. C12H24O4N requires 246.1705].

**2,5-Di-*O*-methoxymethyl-3,4-*O*-isopropylidene-5a-carba--l-gulopyranose (15):** (2*R*,3*S*,4*R*,5*R*)-1-methylidene-3,4-(isopropylidenedioxy)-2,5-bis(methoxymethoxy)cyclohexane **(13**, 0.041 g, 0.141mmol) was dissolved in dry THF (15 ml) and placed at 0 C. Borane-methyl sulphide complex (2 M in THF, 0.1 ml, 0.2 mmol) was added and the reaction mixture was warmed up to room temperature. After 12 h, BH3-SMe2 (2 M, 0.1 ml, 0.2 mmol) was again added at 0 C. After 2 h at the same temperature, water (1 ml) was added, followed by sodium hydroxide (2 N in water, 0.5 ml) and hydrogen peroxide (27%, 2.5 ml, 0.68 mmol). After 60 h at 0 C, sodium hydroxide (2 N in water, 5 ml) was added, followed by water (40 ml). The crude product was extracted with ethyl acetate (3 x 40 ml). The organic layers were combined, dried (Na2SO4), concentrated and purified by flash chromatography on silica gel with diethyl ether to give the title compound **15** (0.041 g, 94%) as a colourless oil, max(film)/cm-1 3455 (OH), 2927, 2854, 2360, 2337, 1731, 1646, 1461, 1380, 1265, 1214, 1149, 1106, 1037, 917 and 863; H (270 MHz) (with the help of a 1H-1H NMR) 1.36 (3 H, s, Me), 1.51 (3 H, s, Me), 1.55–1.62 (1 H, dd, *J* 7.25 and 13.19, C*H*HCHOMOM), 1.66 (1 H, bs, OH), 1.82–1.87 (1 H, dd, *J* 3.3 and 9.9, CH*H*CHOMOM), 2.31 (1 H, m, C*H*CH2OH), 3.40 (3 H, s, OMe), 3.41 (3 H, s, OMe), 3.60 (2 H, d, *J* 6.59, C*H2*OH), 3.80–3.83 (1 H, t, *J* 3.3 and 2.64, C*H*(OMOM)CHCH2OH), 4.08–4.15 (1 H, qd, *J* 2.64, 7.25 and 9.89, CH2C*H*(OMOM)), 4.30–4.34 (1 H, dd, *J* 3.3, 2.63 and 7.26, C*H*CH(OMOM)CHCH2OH), 4.49–4.53 (1 H, dd, *J* 2.63 and 7.26, C*H*CH(OMOM)CH2), 4.63 (1 H, d, *J* 6.6, OC*H*HO), 4.71 (1 H, d, *J* 6.6, OCH*H*O), 4.75 (2 H, d, *J* 7.26, OC*H2*O); C (67.8 MHz) 24.42 (1 C, Me), 26.62 (1 C, Me), 29.66 (1 C, *C*H2CHOMOM), 34.08 (1 C, *C*H2OH), 55.43–56.00 (2 C, 2 x OMe), 63.69 (1 C, *C*HCH2OH), 70.69, 75.03, 75.59 and 75.62 (4 C, 4 x CHOR), 95.54 and 96.73 (2 C, 2 x O*C*H2O), 109.49 (1 C, *C*Me2); *m/z* (EI) 307 (M+ + H+), 275, 243 and 144 [Found: MH+ 307.1757. C14H27O7 requires 307.1757].

**5a-Carba--l-gulopyranose (16):** 5,2-Di-*O*-methoxymethyl-4,3-*O*-isopropylidene-5a-carba--l-gulopyranose (**15**, 0.016 g, 0.052 mmol) was dissolved in methanol (2 ml) and HCl (6 N in water, 1 ml) was added at room temperature. After 12 h, the methanol was evaporated and the crude title compound **16** (0.010 g, 99%) was obtained and directly analysed, []D 0 (*c* 1.56 in methanol), H (270 MHz at 50 C, in CD3OD) 1.70–1.74 (2 H, bt, *J* 3.63, CH(OH)C*H2*CH), 2.15–2.21 (1 H, bddd, *J* 2.72 and 6.84, C*H*CH2OH), 3.52–3.59 (1 H, dd, *J* 6.19 and 10.72, C*H*HOH), 3.64 (1 H, m, CH*H*OH), 3.66–3.73 (1 H, dd, *J* 6.76 and 10.64, C*H*OH), 3.83 (1 H, bs, C*H*OH), 4.01 (2 H, bt, *J* 2.72, 2 x C*H*OH).

**1,2,3,4,6-Penta*-O*-acetyl-5a-carba--l-gulopyranose (17):** 5a-Carba--l-gulopyranose(**16** ,0.010 g, 0.056 mmol) was dissolved in pyridine (1 ml). Acetic anhydride (1 ml) was added at room temperature. After 12 h, the solvents were evaporated (this operation was facilitated by the use of toluene) and the crude product was purified by a first flash chromatography on silica gel with diethyl ether and a second flash chromatography on silica gel with a solution of light petroleum/diethyl ether (1:4) as eluents to afford the title compound **17** (0.012 g, 57%) as a colourless oil, []D −19.0 (*c* 0.42 in CHCl3); H (270 MHz) 1.86–1.90 (2 H, td, *J* 3.96 and 8.9, C*H2*CHOAc), 2.05 (3 H, s, Me), 2.07 (3 H, s, Me), 2.08 (6 H, s, Me), 2.10 (3 H, s, Me), 2.62 (1 H, bm, C*H*CH2OAc), 3.97–4.04 (1 H, dd, *J* 6.6 and 11.21, C*H2*OAc) 4.06–4.12 (1 H, dd, *J* 6.6 and 11.21, C*H2*OAc), 5.23–5.32 (4 H, m, 4 x C*H*OAc); C (67.8 MHz) 20.63, 20.66, 20.71, 20.79 and 20.88 (5 C, 5 x CO*Me*), 27.63 (1 C, CHOAc*C*H2CH), 29.70 (1 C, AcOCH2*C*H), 63.00 (1 C, *C*H2OAc), 67.11, 67.96, 68.55 and 69.19 (4 C, 4 x *C*HOAc), 169.33, 169.62, 169.86, 169.88 and 171.5 (5 C, 5 x C=O); *m/z* (CI, NH3) 364, 288 and 276. [Found: M + NH4+ 406.1713. C17H28O10N requires 406.1713].

**6,7-Dideoxy-3,4-*O*-isopropylidene-2,5-bis-*O*-(methoxymethyl)-7-phenyl-l-allohept-6-ynose (20):**The primary alcohol **6a** (1.58 g, 4.16 mmol) was dissolved in dichloromethane (30 ml). To this solution 4 Å molecular sieves (2.0 g) and pyridinium chlorochromate (2.69 g, 12.47 mmol) were added. The reaction mixture was stirred for 2 h and then poured onto a flash chromatography column packed with silica gel. Elution with diethyl ether and light petroleum (1:1) yielded the title compound **20** (1.34 g, 85%) as a colourless oil, which proved to be labile. [a]D +58 (*c* 1.32, CHCl3); max(film)/cm-1 2994, 2941, 2889, 2825, 2225 (CC), 1723 (C=O), 1605, 1493, 1446, 1378, 1259, 1213, 1160, 1098, 1028 and 918; dH (270 MHz) 1.37 (3 H, s, Me), 1.48 (3 H, s, Me), 3.43 (3 H, s, OMe), 3.48 (3 H, s, OMe), 4.51 (1 H, bd, *J* 4.31, C*H*CHO), 4.54–4.60 (2 H, m, *J* 2.1 and 6.5,C*H*CH(OMOM)CHO and C*H*CH(OMOM)C triple bond), 4.74 (1 H, d, *J* 6.3, OC*H*HO), 4.79 (1 H, d, *J* 6.3, OC*H*HO), 4.84 (1 H, d, *J* 6.3, OCH*H*O), 4.98 (1 H, d, *J* 6.6, C*H*(OMOM)C triple bond), 5.07 (1 H, d, *J* 6.3, OCH*H*O), 7.29–7.34 (3 H, m, Ph), 7.39–7.42 (2 H, m, Ph) and 9.78 (1 H, d, *J* 1.95, C*H*O); dC (67.8 MHz) 25.17 (1 C, Me), 26.78 (1 C, Me), 55.89 and 56.19 (2 C, 2 x OMe), 65.73 (1 C, *C*HCHO), 75.28, 78.49 and 79.89 (3 C, 3 x CHOR), 84.78 and 88.23 (2 C, CC), 94.30 and 97.38 (2 C, 2 x O*C*H2O), 109.68 (1 C, *C*Me2), 121.38 (1 C, Ph), 127.39 (2 C, Ph), 128.76 (1 C, Ph), 131.67 (2 C, Ph) and 200.18 (1 C, *C*HO).

**6,7-Dideoxy-3,4-*O*-isopropylidene-2,5-bis-*O*-(methoxymethyl)-7-phenyl-d-talohept-6-ynose (21):** The primary alcohol **6b** (1.24 g, 3.26 mmol) was dissolved in dichloromethane (30 ml); to this solution 4 Å molecular sieves (2.0 g) and pyridinium chlorochromate (2.11 g, 9.79 mmol) were added. After stirring for 2 h at room temperature, the reaction mixture was poured onto a flash chromatography column packed with silica gel and eluted with diethyl ether and light petroleum (1:1) to yield the title compound **21** (1.11 g, 90%) as a labile, colourless oil. [a]D −43 (*c* 1.2, CHCl3); max(film)/cm-1 3053, 2989, 2935, 2893, 2825, 2227 (CC), 1728 (C=O), 1601, 1494, 1445, 1380, 1258, 1211, 1158, 1105, 1029, and 917; dH (270 MHz) 1.37 (3 H, s, Me), 1.46 (3 H, s, Me), 3.36 (3 H, s, OMe), 3.46 (3 H, s, OMe), 4.48 (1 H, dd, *J* 2.0 and 4.9, C*H*CHO), 4.53–4.65 (2 H, m, C*H*CH(OMOM)CHO and C*H*CH(OMOM)C CC), 4.67–4.78 (3 H, m, OC*H*HO and OC*H2*O), 4.93 (1 H, d, *J* 6.59, C*H*(OMOM)C), 5.07 (1 H, d, *J* 6.0, OCH*H*O), 7.29–7.38 (3 H, m, Ph), 7.43–7.46 (2 H, m, Ph) and 9.73 (1 H, d, *J* 1.84, C*H*O); dC (67.8 MHz) 25.19 (1 C, Me), 26.85 (1 C, Me), 54.80 and 55.12 (2 C, 2 x OMe), 65.17 (1 C, *C*HCHO), 77.28, 78.29 and 80.29 (3 C, 3 x CHOR), 84.79 and 88.11 (2 C, Carbon triple bond), 94.19 and 96.38 (2 C, 2 x O*C*H2O), 109.58 (1 C, *C*Me2), 120.58 (1 C, Ph), 127.54 (2 C, Ph), 128.46 (1 C, Ph), 130.98 (2 C, Ph) and 197.88 (1 C, *C*HO).

**1,2-Dideoxy-1,7-diphenyl-3,6-di-*O*-methoxymethyl-4,5-*O*-isopropylidene-d-*allo*-hept-1-ynitol (22):** Phenylmagnesium chloride (1 M in THF, 39.3 ml, 39.3 mmol) was added to a solution of aldehyde **20** (1.47 g, 3.93 mmol) in dry THF (40 ml) at 0 C. After 1 h, the solvent was removed under reduced pressure and the residue was dissolved in ethyl acetate (80 ml), washed with saturated aqueous NH4Cl (50 ml) and extracted with ethyl acetate (2 x 80 ml). The organic layers were combined, dried over Na2SO4, concentrated and purified by flash chromatography, using light petroleum/diethyl ether (1:1) as eluent to yield the title compound **22** (1.27 g, 72%) as colourless oil.

Diastereoisomer, *Rf* = 0.36 in light petroleum/diethyl ether (2:1) **22**,[a]D +9 (*c* 1.7, CHCl3); max(film)/cm-1 3455 (OH), 3062, 3033, 2987, 2933, 2898, 2850, 2825, 2231 (CºC),1598, 1490, 1454, 1373, 1257, 1214, 1151, 1043, 970 and 919; dH (270 MHz) 1.37 (3 H, s, Me), 1.64 (3 H, s, Me), 3.40 (3 H, s, OMe), 3.43 (3 H, s, OMe), 4.05 (1 H, dd, *J* 2.0 and 7.3, C*H*(OH)Ph), 4.29 (1 H, d, *J* 7.3, O*H*), 4.38–4.41 (1 H, dd, *J* 3.3 and 4.6, C*H*CH(OH)Ph), 4.42 (1 H, dd, *J* 1.3 and 2.6, C*H*CHC), 4.62 (1 H, d, *J* 6.6, OC*H*HO), 4.64 (1 H, d, *J* 6.6, OC*H*HO), 4.70 (1 H, d, *J* 7.3, OCH*H*O), 4.87 (1 H, d, *J* 2.6, C*H*C), 5.01 (1 H, dd, *J* 4.0 and 5.9, C*H*CH CH(OH)Ph), 5.11 (1 H, d, *J* 6.6, OCH*H*O), 7.32–7.38 (6 H, m, Ph), and 7.42–7.49 (4 H, m, Ph); dC (67.8 MHz) 24.82 (1 C, Me), 26.78 (1 C, Me), 55.78 and 56.42 (2 C, 2 x OMe), 65.80 (1 C, *C*H(OH)Ph), 74.59, 76.53, 77.47 and 81.78 (4 C, 4 x CHOR), 85.08 and 87.83 (2 C, CºC), 93.99 and 98.50 (2 C, 2 x O*C*H2O), 109.32 (1 C, *C*Me2), 122.42 (1 C, Ph), 127.50 (2 C, Ph), 127.69 (1 C, Ph), 127.90 (2 C, Ph), 128.35 (2 C, Ph), 128.56 (1 C, Ph), 131.66 (2 C, Ph) and 139.83 (1 C, Ph); *m/z* (CI, NH3), 474 (M + NH4+), [Found: M + NH4+, 474.2484. C26H36O7N requires M + NH4+ 474.2492].

Diastereoisomer, *Rf* = 0.32 in light petroleum/diethyl ether (2:1) **22**,[a]D +11.5 (*c* 2.1, CHCl3); max(film)/cm-1 3480 (OH), 3062, 3014, 2987, 2935, 2896, 2845, 2825, 2231 (CºC),1598, 1490, 1452, 1378, 1257, 1216, 1151, 1085, 1031 and 919; dH (270 MHz) 1.37 (3 H, s, Me), 1.66 (3 H, s, Me), 3.27 (3 H, s, OMe), 3.40 (3 H, s, OMe), 4.29–4.35 (2 H, dt, *J* 2.6 and 6.6, C*H*(OH)Ph and C*H*CH(OH)Ph), 4.43–4.49 (3 H, m, C*H*CH triple bond, C*H*CHCH(OH)Ph and OC*H*HO), 4.71 (1 H, d, *J* 5.9, OC*H*HO), 4.96 (1 H, d, *J* 3.3, C*H*C), 5.09 (2 H, d, *J* 6.6, OC*HH*O), 5.21 (1 H, s, OH), 7.21–7.38 (6 H, m, Ph), and 7.46–7.51 (4 H, m, Ph); dC (67.8 MHz) 24.85 (1 C, Me), 26.65 (1 C, Me), 55.74 and 56.09 (2 C, 2 x OMe), 66.09 (1 C, *C*H(OH)Ph), 73.00, 76.53, 78.89 and 79.37 (4 C, 4 x CHOR), 85.55 and 87.62 (2 C, CºC), 94.12 and 97.41 (2 C, 2 x O*C*H2O), 109.15 (1 C, *C*Me2), 122.48 (1 C, Ph), 126.01 (2 C, Ph), 127.32 (1 C, Ph), 128.11 (2 C, Ph), 128.38 (1 C, Ph), 128.58 (2 C, Ph), 128.66 (1 C, Ph), 131.63 (1 C, Ph) and 140.95 (1 C, Ph); *m/z* (CI, NH3), 474 (M + NH4+), [Found: M + NH4+, 474.2480. C26H36O7N requires M + NH4+ 474.2492].

**1,2-Dideoxy-1,7-diphenyl-3,6-di-*O*-methoxymethyl-4,5-*O*-isopropylidene-d-*altro*-hept-1-ynitols (23)** Phenylmagnesium chloride (1 M in THF, 24.76 ml, 24.76 mmol) was added to a solution of compound **21** (0.93 g, 2.48 mmol) in dry THF (20 ml) at 0 C. After 1 h, the solvent was removed under reduced pressure and the residue was dissolved in ethyl acetate (50 ml), washed with saturated aqueous NH4Cl (30 ml) and the aqueous phase back-extracted with ethyl acetate (2 x 50 ml). The organic layers were combined, dried over Na2SO4, concentrated and purified by flash chromatography on silica gel with light petroleum/diethyl ether (3:1 to 1:1) as eluents to yield the title compounds **23** (0.8 g, 71%) as colourless oil.

Diastereoisomer, *Rf* = 0.32 in light petroleum/diethyl ether (3:1) **23**,[a]D +15 (*c* 1.2, CHCl3); max(film)/cm-1 3483 (OH), 3089, 3049, 2989, 2946, 2887, 2823, 2223 (CC),1603, 1485, 1457, 1381, 1216, 1153, 1079, 1029 and 918; dH (270 MHz) 1.38 (3 H, s, Me), 1.61 (3 H, s, Me), 3.33 (3 H, s, OMe), 3.47 (3 H, s, OMe), 4.06 (1 H, dd, *J* 5.8 and 8.1, C*H*CHCH(OH)Ph), 4.39 (1 H, dd, *J* 4.7 and 5.0, C*H*CH(OH)Ph), 4.50 (1 H, dd, *J* 4.2 and 7.9, C*H*CHC CC), 4.57 (1 H, d, *J* 6.4, OC*H*HO), 4.68 (1 H, d, *J* 6.4, OC*H*HO), 4.73 (1 H, d, *J* 6.5, OC*H*HO), 4.87 (1 H, d, *J* 4.7, C*H*(OH)Ph), 4.98 (1 H, d, *J* 4.1, C*H*C triple bond), 5.1 (1 H, d, *J* 6.4, OC*H*HO), 5.14 (1 H, s, OH), 7.24–7.41 (6 H, m, Ph), and 7.45–7.49 (4 H, m, Ph); dC (67.8 MHz) 25.58 (1 C, Me), 26.98 (1 C, Me), 56.38 and 56.47 (2 C, 2 x OMe), 66.13 (1 C, *C*H(OH)Ph), 73.69, 77.21, 78.83 and 81.94 (4 C, 4 x CHOR), 85.68 and 87.73 (2 C, CC), 94.73 and 98.96 (2 C, 2 x O*C*H2O), 109.17 (1 C, *C*Me2), 122.38 (1 C, Ph), 127.49 (1 C, Ph), 127.65 (2 C, Ph), 127.78 (2 C, Ph), 128.29 (2 C, Ph), 128.63 (1 C, Ph), 131.83 (2 C, Ph) and 135.28 (1 C, Ph); *m/z* (CI, NH3), 474 (M + NH4+), [Found: M + NH4+, 474.2488. C26H36O7N requires M + NH4+ 474.2492].

Diastereoisomer, *Rf* = 0.26 in light petroleum/diethyl ether (3:1) **23**,[a]D −23 (*c* 1.8, CHCl3); max(film)/cm-1 3521 (OH), 3057, 3029, 2986, 2939, 2886, 2829, 2223 (CC),1603, 1494, 1455, 1253, 1221, 1154, 1085, 1033 and 921; dH (270 MHz) 1.38 (3 H, s, Me), 1.61 (3 H, s, Me), 3.23 (3 H, s, OMe), 3.38 (3 H, s, OMe), 4.33 (1 H, d, *J* 6.4, C*H*CHCH(OH)Ph), 4.4 (1 H, d, *J* 6.5, OC*H*HO), 4.45 (1 H, dd, *J* 5.8 and 9.9, C*H*CH(OH)Ph), 4.52 (1 H, dd, *J* 2.1 and 6.0 , C*H*CHC CC), 4.58 (1 H, d, *J* 6.1, OC*H*HO), 4.74 (1 H, d, *J* 6.6, OC*H*HO), 4.93 (1 H, d, *J* 4.7, C*H*(OH)Ph), 5.09 (1 H, d, *J* 6.7, OC*H*HO), 5.18 (1 H, d, *J* 2.1, C*H*C triple bond), 5.24 (1 H, s, OH), 7.20–7.38 (6 H, m, Ph), and 7.43–7.47 (4 H, m, Ph); dC (67.8 MHz) 25.18 (1 C, Me), 26.33 (1 C, Me), 55.78 and 55.89 (2 C, 2 x OMe), 65.73 (1 C, *C*H(OH)Ph), 73.13, 77.25, 78.67 and 78.73 (4 C, 4 x CHOR), 85.38 and 87.59 (2 C, CC), 94.57 and 98.98 (2 C, 2 x O*C*H2O), 109.38 (1 C, *C*Me2), 122.38 (1 C, Ph), 126.12 (2 C, Ph), 127.09 (1 C, Ph), 127.83 (2 C, Ph), 128.13 (2 C, Ph), 128.37 (1 C, Ph), 131.53 (2 C, Ph) and 139.42 (1 C, Ph); *m/z* (CI, NH3), 474 (M + NH4+), [Found: M + NH4+, 474.2476. C26H36O7N requires M + NH4+ 474.2492].

**1,2-Dideoxy-7-methyl-3,6-di-*O*-methoxymethyl-4,5-*O*-isopropylidene-1-phenyl-d-*allo*-hept-1-ynitol (24):** Methylmagnesium bromide (1 M in THF, 44.5 ml, 44.5 mmol) was added to a solution of compound **20** (1.69 g, 4.46 mmol) in dry THF (40 ml) at 0 C. After 1 h, the solvent was removed under reduced pressure and the residue was dissolved in ethyl acetate (80 ml), washed with saturated aqueous NH4Cl (50 ml) and extracted with ethyl acetate (2 x 80 ml). The organic layers were combined, dried over Na2SO4, concentrated and purified by flash chromatography, using light petroleum/diethyl ether (1:1) as eluent to give the title compound **24** (1.4 g 80%) as colourless oils.

Diastereoisomer, *Rf* = 0.32 in light petroleum/diethyl ether (2:1) **24** [a]D +68.18 (*c* 1.01 in CHCl3); max(film)/cm-1 3444 (OH), 3079, 3014, 2985, 2937, 2894, 2827, 2284, 2231 (CºC), 1598, 1490, 1444, 1374, 1247, 1214, 1151, 1093, 1041, 973 and 916; dH (270 MHz) 1.26 (3 H, dd, *J* 7.26 and 13.86, CHCHC*H3*OH), 1.39 (3 H, s, Me), 1.57 (3 H, s, Me), 3.43 (3 H, s, OMe), 3.47 (3 H, s, OMe), 3.85 (1 H, d, *J* 9.9, CHO*H*), 4.01 (1 H, dq, J 2.0 and 6.6, CHC*H*CH3), 4.08–4.16 (2 H, m, C*H*CH(OH)CH3, and C*H*CHC), 4.47 (1 H, dd, *J* 2.6 and 6.6, C*H*CHCH(OH)CH3), 4.70 (1 H, d, *J* 7.3, OCH*H*O), 4.79 (3 H, m, OC*HH*O), 4.95 (1 H, d, *J* 4.0, C*H*C), 5.12 (1 H, d, *J* 6.6, OC*H*HO), 7.27–7.35 (3 H, m, Ph), and 7.41–7.46 (2 H, m, Ph); dC (67.8 MHz) 16.55 (1 C, MeOH), 24.96 (1 C, Me), 26.92 (1 C, Me), 55.85 and 56.10 (2 C, 2 x OMe), 65.35 (1 C, *C*H(OH)CH3), 67.42, 76.53, 77.47 and 83.49 (4 C, 4 x CHOR), 84.63 and 87.69 (2 C, CºC), 93.85 and 98.41 (2 C, 2 x O*C*H2O), 109.22 (1 C, *C*Me2), 122.25 (1 C, Ph), 128.31 (2 C, Ph), 128.57 (1 C, Ph) and 131.64 (2 C, Ph); *m/z* (CI, NH3), 412 (M + NH4+), [Found: M + NH4+, 412.2338. C21H34O7SiN requires M + NH4+ 412.2335].

Diastereoisomer, *Rf* = 0.26 in light petroleum/diethyl ether (2:1) **24** [a]D +51.9 (*c* 1.31 in CHCl3); max(film)/cm-1 3469 (OH), 3054, 3040, 2983, 2935, 2896, 2825, 2782, 2231 (CºC), 1598, 1490, 1444, 1401, 1373, 1259, 1214, 1151, 1097, 1035 and 919; dH (270 MHz) 1.31 (3 H, dd, *J* 5.9 and 12.4, CHCHC*H3*OH), 1.41 (3 H, s, Me), 1.61 (3 H, s, Me), 2.90 (1 H, d, *J* 8.6, CHO*H*), 3.42 (3 H, s, OMe), 3.43 (3 H, s, OMe), 4.06–4.14 (2 H, m, CHC*H*(OH)CH3, and CHC*H*C triple bond) 4.41–4.46 (1 H, m, CHC*H*CH(OH)CH3), 4.52 (1 H, dd, *J* 2.6 and 7.3, C*H*CHC triple bond), 4.69–4.71 (1 H, d, *J* 7.3, OC*H*HO), 4.75–4.80 (2 H, m, OC*HH*O), 4.9 (1 H, d, *J* 2.6, CHC*H*CHC triple bond), 5.09 (1 H, d, *J* 7.3, OC*H*HO), 7.30–7.32 (3 H, m, Ph), and 7.42–7.45 (2 H, m, Ph); dC (67.8 MHz) 18.0 (1 C, MeOH), 24.84 (1 C, Me), 26.57 (1 C, Me), 55.77 and 56.09 (2 C, 2 x OMe), 65.85 (1 C, *C*H(OH)CH3), 68.35, 76.53, 78.46 and 79.08 (4 C, 4 x CHOR), 85.01 and 87.61 (2 C, carbon triple bond), 93.92 and 97.47 (2 C, 2 x O*C*H2O), 109.30 (1 C, *C*Me2), 122.34 (1 C, Ph), 128.28 (2 C, Ph), 128.47 (1 C, Ph) and 131.52 (2 C, Ph); *m/z* (CI, NH3) 412 (M + NH4+), [Found: M + NH4+, 412.2342. C21H34O7N requires M + NH4+ 412.2335].

**1,2-Dideoxy-7-methyl-3,6-di-*O*-methoxymethyl-4,5-*O*-isopropylidene-1-phenyl-d-*altro*-hept-1-ynitol (25):** Methylmagnesium bromide (1 M in THF, 22.38 ml, 22.38 mmol) was added to a solution of compound **21** (0.85 g, 2.24 mmol) in dry THF (20 ml) at 0 C. After 1 h, the solvent was removed under reduced pressure and the residue was dissolved in ethyl acetate (50 ml), washed with saturated aqueous NH4Cl (30 ml) and extracted with ethyl acetate (2 x 50 ml). The organic layers were combined, dried over Na2SO4, concentrated and purified by flash chromatography, using light petroleum/diethyl ether (3:1 to 1:1) as eluent to yield the title compounds **25** (0.7 g, 79%) as colourless oil.

Diastereoisomer, *Rf* = 0.34 in light petroleum/diethyl ether (3:1) **25**,[a]D −14 (*c* 1.3, CHCl3); max(film)/cm-1 3463 (OH), 3084, 3039, 2981, 2937, 2894, 2825, 2231 (CC), 1598, 1490, 1444, 1378, 1249, 1214, 1151, 1097, 1041 and 918; dH (270 MHz) 1.27 (3 H, dd, *J* 6.6 and 12.5, CHCHC*H3*OH), 1.37 (3 H, s, Me), 1.55 (3 H, s, Me), 2.89 (1 H, d, *J* 2.6, O*H*), 3.40 (3 H, s, OMe), 3.41 (3 H, s, OMe), 4.8 (1 H, dd, *J* 5.7 and 8.0, C*H*CHCH(OH)CH3), 4.42 (1 H, dd, *J* 6.6 and 7.9, C*H*CH(OH)CH3), 4.51 (1 H, dd, *J* 2.6 and 4.0, C*H*CHC triple bond), 4.67 (1 H, d, *J* 6.6, OC*H*HO), 4.76 (2 H, d, *J* 7.3, OC*HH*O), 4.88 (1 H, d, *J* 8.6, C*H*(OH)CH3), 4.95 (1 H, d, *J* 4.0, C*H*C), 5.07 (1 H, d, *J* 7.3, OC*H*HO), 7.26–7.30 (3 H, m, Ph), and 7.41–7.43 (2 H, m, Ph); dC (67.8 MHz) 17.55 (1 C, Me), 25.59 (1 C, Me), 27.02 (1 C, Me), 56.63 and 56.75 (2 C, 2 x OMe), 66.23 (1 C, *C*H(OH)CH3), 73.78, 77.25, 78.93 and 81.96 (4 C, 4 x CHOR), 85.69 and 87.59 (2 C), 94.78 and 98.93 (2 C, 2 x O*C*H2O), 109.13 (1 C, *C*Me2), 122.39 (1 C, Ph), 127.76 (1 C, Ph), 127.93 (2 C, Ph) and 128.28 (2 C, Ph); *m/z* (CI, NH3), 412 (M + NH4+), [Found: M + NH4+, 412.2336. C21H34O7N requires M + NH4+ 412.2335].

Diastereoisomer, *Rf* = 0.26 in light petroleum/diethyl ether (3:1) **25** [a]D −19 (*c* 1.1 in CHCl3); max(film)/cm-1 3459 (OH), 3083, 3040, 2985, 2935, 2896, 2829, 2229 (CC), 1596, 1494, 1447, 1377, 1251, 1211, 1154, 1095, 1039 and 917; dH (270 MHz) 1.25 (3 H, dd, *J* 6.6 and 12.4, CHCHC*H3*OH), 1.35 (3 H, s, Me), 1.58 (3 H, s, Me), 2.90 (1 H, d, *J* 2.7, O*H*), 3.39 (3 H, s, OMe), 3.40 (3 H, s, OMe), 4.06 (1 H, dd, *J* 5.8 and 5.4, C*H*CHCH(OH)CH3), 4.42 (1 H, dd, *J* 6.6 and 4.5, C*H*CH(OH)CH3), 4.49 (1 H, dd, *J* 2.6 and 3.9, C*H*CHC triple bond), 4.65 (1 H, d, *J* 6.6, OC*H*HO), 4.73 (2 H, d, *J* 7.2, OC*HH*O), 4.85 (1 H, d, *J* 8.0, C*H*(OH)CH3), 4.94 (1 H, d, *J* 5.0, C*H*C), 5.06 (1 H, d, *J* 7.2, OC*H*HO), 7.25–7.29 (3 H, m, Ph), and 7.40–7.42 (2 H, m, Ph); dC (67.8 MHz) 17.52 (1 C, Me), 25.63 (1 C, Me), 27.13 (1 C, Me), 56.61 and 56.72 (2 C, 2 x OMe), 66.24 (1 C, *C*H(OH)CH3), 73.75, 77.26, 78.88 and 81.94 (4 C, 4 x CHOR), 85.73 and 87.62 (2 C, CC), 94.82 and 98.89 (2 C, 2 x O*C*H2O), 109.11 (1 C, *C*Me2), 122.42 (1 C, Ph), 127.79 (1 C, Ph), 127.96 (2 C, Ph) and 128.31 (2 C, Ph); *m/z* (CI, NH3), 412 (M + NH4+), [Found: M + NH4+, 412.2344. C21H34O7SiN requires M + NH4+ 412.2335].

**1,2-Dideoxy-7-iodo-1,7-diphenyl-3,6-di-*O*-methoxymethyl-4,5-*O*-isopropylidene-d-*allo*-hept-1-ynitol (26):**The secondary alcohols **22** (1.40 g, 3.08 mmol) were converted to the iodides **26** using the same method as for compound **27**, which afforded the title compound **26** as an inseparable mixture of isomers (1.36 g, 78%) and as a colourless oil. max(film)/cm-1 3083, 3059, 3029, 2987, 2931, 2896, 2831, 2253 (CºC),1604, 1495, 1453, 1385, 1250, 1210, 1149, 1106, 1043 and 983; dH (270 MHz) 1.18 (3 H, s, Me), 1.59 (3 H, s, Me), 3.40 (3 H, s, OMe), 3.43 (3 H, s, OMe), 3.92 (1 H, dd, *J* 3.9 and 9.2, C*H*CHC), 4.13 (1 H, d, *J* 7.3, OC*H*HO), 4.39 (1 H, dd, *J* 2.6 and 9.2, C*H*CHCHIPh), 4.61 (1 H, dd, *J* 2.6 and 8.3, C*H*CHI), 4.69 (1 H, d, *J* 6.6, OC*H*HO), 5.05–5.08 (2 H, m, C*H*I and OC*H*HO), 5.21 (1 H, d, *J* 6.6, OC*H*HO), 5.63 (1 H, d, *J* 2.6, C*H*C triple bond), 7.23–7.26 (3 H, m, Ph), 7.33–7.35 (3 H, m, Ph), 7.45–7.48 (2 H, m, *ortho*-Ph) and 7.53–7.56 (2 H, m, *ortho*-Ph); dC (67.8 MHz) 24.66 (1 C, Me), 26.62 (1 C, Me), 32.09 (1 C, *C*HI), 55.87 and 56.26 (2 C, 2 x OMe), 65.85, 76.53, 76.68, and 77.73 (4 C, 4 x CHOR), 85.48 and 87.67 (2 C, CºC), 95.27 and 98.78 (2 C, 2 x O*C*H2O), 108.77 (1 C, *C*Me2), 122.54 (1 C, Ph), 127.72 (2 C, Ph), 127.94 (1 C, Ph), 128.32 (2 C, Ph), 128.45 (1 C, Ph), 130.13 (2 C, Ph), 131.62 (2 C, Ph) and 138.98 (1 C, Ph).

*NOTE: A molecular ion was not observed in the MS*.

**1,2-Dideoxy-7-iodo-1,7-diphenyl-3,6-di-*O*-methoxymethyl-4,5-*O*-isopropylidene-d-*altro*-hept-1-ynitol (27):**The secondary alcohols **23** (0.70 g, 1.54 mmol) were dissolved in dry toluene (20 ml); to this solution triphenylphosphine (1.21 g, 4.17 mmol) and imidazole (0.31 g, 4.17 mmol) were added. The reaction mixture was warmed to 60 C. To the resultant mixture, iodine (0.39 g, 3.08 mmol) was added. After 2 h, the reaction was poured directly onto saturated aqueous sodium thiosulphate (50 ml) and extracted with ethyl acetate (3 x 70 ml). The organic layers were combined, dried over Na2SO4 and evaporated under reduced pressure. It was observed that the product decomposed during chromatography as evidenced by colouration of the silica gel. Flash chromatography was thus conducted as rapidly as possible, on silica gel with light petroleum/diethyl ether (8:1) as eluent to yield the title compound **27** as an inseparable mixture of isomers (0.64 g, 73%) as a colourless oil. nmax(film)/cm-1 3074, 3058, 3022, 2986, 2948, 2898, 2858, 2838, 2236 (CºC),1583, 1494, 1455, 1391, 1253, 1221, 1148, 1085, 1033 and 921; dH (270 MHz) 1.19 (3 H, s, Me), 1.57 (3 H, s, Me), 3.40 (3 H, s, OMe), 3.48 (3 H, s, OMe), 3.89 (1 H, dd, *J* 5.7 and 8.3, C*H*CHIPh), 4.32 (1 H, dd, *J* 3.1 and 5.7, C*H*CHI), 4.63 (1 H, dd, *J* 2.9 and 8.3, C*H*CHC), 4.67 (1 H, d, *J* 6.7, OC*H*HO), 5.03 (1 H, d, *J* 2.5, C*H*I), 5.06 (1 H, d, *J* 6.5, OC*H*HO), 5.09 (1 H, d, *J* 6.7, OC*H*HO), 5.14 (1 H, d, *J* 6.6, OC*H*HO), 5.70 (1 H, d, *J* 2.9, C*H*C), 7.16–7.23 (3 H, m, Ph), 7.23–7.32 (3 H, m, Ph), 7.42–7.48 (2 H, m, Ph) and 7.53–7.56 (2 H, m, Ph); dC (67.8 MHz) 23.81 (1 C, Me), 25.72 (1 C, Me), 32.54 (1 C, *C*HI), 55.28 and 54.83 (2 C, 2 x OMe), 65.13, 73.13, 77.25, and 78.73 (4 C, 4 x CHOR), 84.37 and 85.93 (2 C, CºC), 94.27 and 98.45 (2 C, 2 x O*C*H2O), 109.09 (1 C, *C*Me2), 121.64 (1 C, Ph), 126.97 (2 C, Ph), 127.28 (1 C, Ph), 127.84 (2 C, Ph), 128.13 (1 C, Ph), 129.81 (2 C, Ph), 131.73 (2 C, Ph) and 138.76 (1 C, Ph).

*NOTE: All attempts to obtain mass spectrometry data proved fruitless employing the different ionisation techniques available.*

**1,2-Dideoxy-7-iodo-7-methyl-3,6-di-*O*-methoxymethyl-4,5-*O*-isopropylidene-1-phenyl-d-*allo*-hept-1-ynitol (28):** The secondary alcohols **24** (1.35 g, 3.42 mmol) were converted to the iodides **28** using the same method as for compound **27**, which afforded title compound **28** as an inseparable mixture of isomers (1.41 g, 85%) as a colourless oil. [a]D +16.5 (*c* 0.49 in CHCl3); nmax(film)/cm-1 3079, 3049, 3018, 2993, 2935, 2894, 2843, 2825, 2782, 2231 (CºC), 1598, 1490, 1392, 1380, 1249, 1214, 1149, 1108, 1039 and 968; dH (270 MHz) 1.40 (3 H, s, Me), 1.60 (3 H, s, Me), 1.93 (3 H, d, *J* 7.3, CHIC*H*3), 3.37 (3 H, s, OMe), 3.41 (3 H, s, OMe), 3.90 (1 H, dd, *J* 2.0 and 3.2, C*H*CHC triple bond), 4.43 (1 H, dd, *J* 6.6 and 7.9, OC*H*HO), 4.49 (1 H, dd, *J* 2.6 and 6.6, C*H*CHCHCH3I), 4.68–4.75 (2 H, m, CHC*H*CHCH3I and CHC*H*CH3I), 4.84 (1 H, d, *J* 7.3, OC*H*HO), 4.90–4.94 (2 H, m, OC*HH*O), 5.09 (1 H, d, *J* 3.3, C*H*C), 7.29–7.33 (3 H, m, Ph) and 7.43–7.47 (2 H, m, Ph); dC (67.8 MHz) 22.72 (1 C, Me), 24.79 (1 C, Me), 26.62 (1 C, MeI), 31.20 (1 C, *C*HI), 55.57 and 56.73 (2 C, 2 x OMe), 65.96, 76.53, 77.47, and 78.20 (4 C, 4 x CHOR), 85.18 and 87.66 (2 C, CºC), 94.28 and 98.97 (2 C, 2 x O*C*H2O), 109.25 (1 C, *C*Me2), 122.44 (1 C, Ph), 128.36 (2 C, Ph), 128.55 (1 C, Ph) and 131.60 (2 C, Ph).

**1,2-Dideoxy-7-iodo-7-methyl-3,6-di-*O*-methoxymethyl-4,5-*O*-isopropylidene-1-phenyl-d-*altro*-hept-1-ynitol (29):** The secondary alcohols **25** (0.68 g, 1.71 mmol), were dissolved in dry toluene (20 ml); to this solution triphenylphosphine (1.21 g, 4.17 mmol) and imidazole (0.31 g, 4.17 mmol) were added. The reaction mixture was warmed to 60 C. To the resultant mixture, iodine (0.39 g, 3.08 mmol) was added. After 2 h, the reaction was poured directly onto saturated aqueous sodium thiosulphate (50 ml) and extracted with ethyl acetate (3 x 70 ml). The organic layers were combined, dried over Na2SO4 and evaporated under reduced pressure. It was observed that the product decomposed during chromatography as evidenced by colouration of the silica gel. Flash chromatography was thus conducted as rapidly as possible, on silica gel with light petroleum/diethyl ether (8:1) as eluent to yield the title compound as an inseparable mixture of isomers **29** (0.73 g, 85%) as a colourless oil. [a]D −18.48 (*c* 0.55 in CHCl3); nmax(film)/cm-1 3080, 3055, 3021, 2985, 2943, 2898, 2855, 2832, 2773, 2232 (CºC), 1587, 1483, 1391, 1384, 1252, 1216, 1148, 1108, 1034 and 974; dH (270 MHz) 1.38 (3 H, s, Me), 1.58 (3 H, s, Me), 1.91 (3 H, d, *J* 7.21, CHICH3), 3.38 (3 H, s, OMe), 3.42 (3 H, s, OMe), 3.89 (1 H, dd, *J* 2.0 and 8.4, C*H*CHC triple bond), 4.42 (1 H, dd, *J* 5.9 and 7.9, OC*H*HO), 4.49 (1 H, dd, *J* 2.6 and 6.6, C*H*CHCHCH3I), 4.65–4.73 (2 H, m, CHC*H*CHCH3I and CHC*H*CH3I), 4.84 (1 H, d, *J* 7.3, OC*H*HO), 4.89–4.93 (2 H, m, OC*HH*O), 5.03–5.06 (1 H, d, *J* 8.6, C*H*C), 7.28–7.34 (3 H, m, Ph) and 7.37–7.39 (2 H, m, Ph); dC (67.8 MHz) 22.82 (1 C, Me), 24.93 (1 C, Me), 26.82 (1 C, MeI), 31.73 (1 C, *C*HI), 55.63 and 56.13 (2 C, 2 x OMe), 66.12, 76.73, 77.38, and 78.19 (4 C, 4 x CHOR), 85.83 and 87.58 (2 C, CºC), 96.28 and 97.18 (2 C, 2 x O*C*H2O), 110.28 (1 C, *C*Me2), 124.82 (1 C, Ph), 128.27 (2 C, Ph), 128.78 (1 C, Ph) and 133.62 (2 C, Ph).

**(1*Z*,2*R*,3*S*,4*R*,5*R*,6*S*)-1-Benzylidene-3,4-(isopropylidenedioxy)-2,5-bis(methoxymethoxy)-6-phenylcyclohexane (30), (1*E*,2*R*,3*S*,4*R*,5*R*,6*S*)-1-benzylidene-3,4-(isopropylidenedioxy)-2,5-bis(methoxymethoxy)-6-phenylcyclohexane (31), (1*Z*,2*R*,3*S*,4*R*,5*R*,6*R*)-1-benzylidene-3,4-(isopropylidenedioxy)-2,5-bis(methoxymethoxy)-6-phenylcyclohexane (32), (1*E*,2*R*,3*S*,4*R*,5*R*,6*R*)-1-benzylidene-3,4-(isopropylidenedioxy)-2,5-bis(methoxymethoxy)-6-phenylcyclohexane (33):** The iodides **27** (0.37 g, 0.65 mmol) were dissolved in dry benzene (50 ml) and the solution was degassed by bubbling argon gas through the solution for 40 min. The solution was placed under reflux at 80 C, a catalytic amount of AIBN was added followed by the addition of tributyltin hydride (0.21 g, 0.19 ml, 0.72 mmol) over 20 min. After 3 h at reflux the reaction mixture was cooled to RT and concentrated. The residue was dissolved in acetonitrile (100 ml), washed with light petroleum (40 ml). The acetonitrile phase was evaporated under reduced pressure. The resultant product was purified by flash chromatography using light petroleum/diethyl ether (3:1 to 1:1) as eluent to give the title compounds as colourless oils **30** (0.09 g, 32%), **31** (0.07 g, 24%), **32** (0.05 g, 16%) and **33** (0.06 g, 19%). Data detailed below:

**(1*Z*,2*R*,3*S*,4*R*,5*R*,6*S*)-1-Benzylidene-3,4-(isopropylidenedioxy)-2,5-bis(methoxymethoxy)-6-phenylcyclohexane (30):** [a]D +56.4 (*c* 1.3 in CHCl3); nmax(film)/cm-1 3074, 3058, 3023, 2987, 2950, 2923, 2895, 2854, 2838, 1734, 1598, 1494, 1455, 1391, 1378, 1253, 1216, 1148, 1107, 1075, 1030 and 918; dH (270 MHz) (with the aid of 2D 1H NMR) 1.47 (3 H, s, Me), 1.68 (3 H, s, Me), 3.09 (3 H, s, OMe), 3.24 (3 H, s, OMe), 4.06 (1 H, d, *J* 6.7, OC*H*HO), 4.12 (1 H, d, *J* 9.6, CHC*H*(Ph)C=), 4.14 (1 H, d, *J* 9.6, CHC*H*(OMOM)C=), 4.31 (2 x 1H, d, *J* 6.5,OC*H*HO and OCH*H*O), 4.45 (1 H, dd, *J* 4.2 and 9.6, CHC*H*(OMOM)CH(Ph)C=), 4.58 (1 H, d, *J* 6.8, OCH*H*O), 4.69 (1 H, dd, *J* 4.7 and 9.7 CHC*H*CH(OMOM)C=), 4.70 (1 H, dd, *J* 4.5 and 6.6, C*H*OR), 6.43 (1 H, s, C=C*H*Ph), 7.16–7.41 (10 H, m, Ph); dC (67.8 MHz) 25.08 (1 C, Me), 25.72 (1 C, Me), 48.27 (1 C, C*H*Ph), 55.46 and 55.67 (2 C, 2 x OMe), 72.58, 75.02, 76.25, and 76.45 (4 C, 4 x CHOR), 94.27 and 96.45 (2 C, 2 x O*C*H2O), 110.39 (1 C, *C*Me2), 126.67 (1 C, Ph), 126.77 (1 C, Ph), 127.28 (2 C, Ph), 128.51 (2 C, Ph), 128.89 (2 C, Ph), 129.18 (1 C, Ph), 131.73 (2 C, Ph) and 136.66 (1 C, Ph), 137.30 and 141.75 (2 C, *C*=*C*HPh); *m/z* (CI, NH3), 458 (M + NH4+), [Found: M + NH4+, 458.2543. C26H36O6N requires M + NH4+ 458.2543].

**(1*E*,2*R*,3*S*,4*R*,5*R*,6*S*)-1-Benzylidene-3,4-(isopropylidenedioxy)-2,5-bis(methoxymethoxy)-6-phenylcyclohexane (31):** [a]D −19.4 (*c* .8 in CHCl3); nmax(film)/cm-1 3074, 3058, 3023, 2987, 2950, 2923, 2895, 2854, 2838, 1734, 1598, 1494, 1455, 1391, 1378, 1253, 1216, 1148, 1107, 1075, 1030 and 918; dH (270 MHz) (with the help of 2D 1H NMR) 1.47 (3 H, s, Me), 1.68 (3 H, s, Me), 3.09 (3 H, s, OMe), 3.24 (3 H, s, OMe), 4.06 (1 H, d, *J* 6.7, OC*H*HO), 4.11 (1 H, d, *J* 9.8, CHC*H*(Ph)C=), 4.11 (1 H, d, *J* 9.8, CHC*H*(OMOM)C=), 4.32 (2 x 1H, d, *J* 6.5, OC*H*HO and OCH*H*O), 4.44 (1 H, dd, *J* 4.2 and 9.8, CHC*H*(OMOM)CH(Ph)C=), 4.58 (1 H, d, *J* 6.8, OCH*H*O), 4.69 (1 H, dd, *J* 4.7 and 9.8 CHC*H*CH(OMOM)C=), 4.72 (1 H, dd, *J* 4.5 and 6.6, C*H*OR), 6.42 (1 H, s, C=C*H*Ph), 7.15–7.41 (10 H, m, Ph); dC (67.8 MHz) 25.08 (1 C, Me), 25.72 (1 C, Me), 48.27 (1 C, C*H*Ph), 55.46 and 55.67 (2 C, 2 x OMe), 72.58, 75.02, 76.25, and 76.45 (4 C, 4 x CHOR), 94.27 and 96.45 (2 C, 2 x O*C*H2O), 110.39 (1 C, *C*Me2), 126.67 (1 C, Ph), 126.77 (1 C, Ph), 127.28 (2 C, Ph), 128.51 (2 C, Ph), 128.89 (2 C, Ph), 129.18 (1 C, Ph), 131.74 (2 C, Ph) and 136.68 (1 C, Ph), 137.29 and 141.39 (2 C, *C*=*C*HPh); *m/z* (CI, NH3), 458 (M + NH4+), [Found: M + NH4+, 458.2546. C26H36O6N requires M + NH4+ 458.2548].

**(1*Z*,2*R*,3*S*,4*R*,5*R*,6*R*)-1-Benzylidene-3,4-(isopropylidenedioxy)-2,5-bis(methoxymethoxy)-6-phenylcyclohexane (32):** [a]D +47.2 (*c* 1.1 in CHCl3); nmax(film)/cm-1 3071, 3058, 3021, 2986, 2953, 2925, 2895, 2851, 2838, 1737, 1598, 1492, 1457, 1391, 1380, 1255, 1218, 1148, 1106, 1075, 1032 and 919; dH (270 MHz) (with the help of 2D 1H NMR) 1.46 (3 H, s, Me), 1.67 (3 H, s, Me), 3.08 (3 H, s, OMe), 3.23 (3 H, s, OMe), 4.06 (1 H, d, *J* 6.7, OC*H*HO), 4.12 (1 H, d, *J* 5.6, CHC*H*(Ph)C=), 4.16 (1 H, d, *J* 9.6, CHC*H*(OMOM)C=), 4.33 (2 x 1H, d, *J* 6.5, OC*H*HO and OCH*H*O), 4.46 (1 H, dd, *J*4.2 and 5.6, CHC*H*(OMOM)CH(Ph)C=), 4.58 (1 H, d, *J* 6.8, OCH*H*O), 4.69 (1 H, dd, *J* 4.7 and 9.7 CHC*H*CH(OMOM)C=), 4.71 (1 H, dd, *J* 4.5 and 6.6, C*H*OR), 6.43 (1 H, s, C=C*H*Ph), 7.16–7.41 (10 H, m, Ph); dC (67.8 MHz) 25.07 (1 C, Me), 25.77 (1 C, Me), 48.29 (1 C, C*H*Ph), 55.47 and 55.69 (2 C, 2 x OMe), 72.82, 75.14, 76.29, and 76.45 (4 C, 4 x CHOR), 94.46 and 96.69 (2 C, 2 x O*C*H2O), 111.09 (1 C, *C*Me2), 126.67 (1 C, Ph), 126.77 (1 C, Ph), 127.28 (2 C, Ph), 128.51 (2 C, Ph), 128.89 (2 C, Ph), 129.18 (1 C, Ph), 131.77 (2 C, Ph) and 136.68 (1 C, Ph), 137.33 and 141.78 (2 C, *C*=*C*HPh); *m/z* (CI, NH3), 458 (M + NH4+), [Found: M + NH4+, 458.2545. C26H36O6N requires M + NH4+ 458.2544].

**(1*E*,2*R*,3*S*,4*R*,5*R*,6*R*)-1-Benzylidene-3,4-(isopropylidenedioxy)-2,5-bis(methoxymethoxy)-6-phenylcyclohexane (33):** [a]D −26.4 (*c* 0.8 in CHCl3); nmax(film)/cm-1 3069, 3059, 3021, 2986, 2953, 2925, 2895, 2851, 2838, 1737, 1598, 1492, 1457, 1391, 1380, 1255, 1218, 1148, 1106, 1075, 1032 and 918; dH (270 MHz) (with the help of 2D 1H NMR) 1.45 (3 H, s, Me), 1.67 (3 H, s, Me), 3.08 (3 H, s, OMe), 3.22 (3 H, s, OMe), 4.06 (1 H, d, *J* 6.7, OC*H*HO), 4.14 (1 H, d, *J* 5.6, CHC*H*(Ph)C=), 4.17 (1 H, d, *J* 9.8, CHC*H*(OMOM)C=), 4.31 (2 x 1H, d, *J* 6.5, OC*H*HO and OCH*H*O), 4.46 (1 H, dd, *J*4.2 and 5.6, CHC*H*(OMOM)CH(Ph)C=), 4.58 (1 H, d, *J* 6.8, OCH*H*O), 4.70 (1 H, dd, *J* 4.7 and 9.8 CHC*H*CH(OMOM)C=), 4.71 (1 H, dd, *J* 4.5 and 6.6, C*H*OR), 6.41 (1 H, s, C=C*H*Ph), 7.16–7.41 (10 H, m, Ph); dC (67.8 MHz) 25.07 (1 C, Me), 25.77 (1 C, Me), 48.29 (1 C, C*H*Ph), 55.49 and 55.70 (2 C, 2 x OMe), 72.81, 75.19, 76.29, and 76.48 (4 C, 4 x CHOR), 94.48 and 96.73 (2 C, 2 x O*C*H2O), 111.09 (1 C, *C*Me2), 126.67 (1 C, Ph), 126.77 (1 C, Ph), 127.28 (2 C, Ph), 128.51 (2 C, Ph), 128.89 (2 C, Ph), 129.18 (1 C, Ph), 131.77 (2 C, Ph) and 137.18 (1 C, Ph), 137.38 and 141.48 (2 C, *C*=*C*HPh); *m/z* (CI, NH3), 458 (M + NH4+), [Found: M + NH4+, 458.2547. C26H36O6N requires M + NH4+ 458.2546].

**(1*Z*,2*R*,3*S*,4*R*,5*R*,6*S*)-1-Benzylidene-3,4-(isopropylidenedioxy)-2,5-bis(methoxymethoxy)-6-methylcyclohexane (34), (1*E*,2*R*,3*S*,4*R*,5*R*,6*S*)-1-benzylidene-3,4-(isopropylidenedioxy)-2,5-bis(methoxymethoxy)-6-methylcyclohexane (35), (1*Z*,2*R*,3*S*,4*R*,5*R*,6*R*)-1-benzylidene-3,4-(isopropylidenedioxy)-2,5-bis(methoxymethoxy)-6-methylcyclohexane (36), (1*E*,2*R*,3*S*,4*R*,5*R*,6*R*)-1-benzylidene-3,4-(isopropylidenedioxy)-2,5-bis(methoxymethoxy)-6-methylcyclohexane (37):** The iodides **29** (0.39 g, 0.77 mmol) were dissolved in dry benzene (50 ml) and the solution was degassed by bubbling argon through the solution for 40 min. The solution was refluxed and a catalytic amount of AIBN was added. Tributyltin hydride (0.25 g, 0.23 ml, 0.84 mmol) was added dropwise to the boiling mixture over 30 min. After a further 3 h under reflux the reaction mixture was concentrated to give a yellow oil. The residue was dissolved in acetonitrile (100 ml), washed with light petroleum (40 ml). The petroleum layer extracted with acetonitrile (2 x 100 ml). The layers of acetonitrile were combined and evaporated under reduced pressure. The residue was purified by flash chromatography with light petroleum/diethyl ether (3:1 to 1:1) as eluent to obtain the title compounds as colourless oils **34** (0.09 g, 30%), **35** (0.07 g, 23%), **36** (0.05 g, 17%) and **37** (0.04 g, 14%).

**(1*Z*,2*R*,3*S*,4*R*,5*R*,6*S*)-1-Benzylidene-3,4-(isopropylidenedioxy)-2,5-bis(methoxymethoxy)-6-methylcyclohexane (34):** *Rf* = 0.72 in light petroleum/diethyl ether (4:6); [a]D +38.2 (*c* 1.65 in CHCl3); nmax (film)/cm-1 3057, 3021, 2985, 2934, 2857, 2828, 2782, 2253, 1726, 1606, 1495, 1464, 1380, 1246, 1217, 1153, 1106, 1074, 1035 and 938; dH (270 MHz) (with the help of 2D 1H NMR) 1.27 (3 H, d, *J* 6.6, CHMe), 1.43 (3 H, s, Me), 1.65 (3 H, s, Me), 3.06 (1 H, dq, *J* 10.6 and 6.6, CHC*H*Me), 3.19 (3 H, s, OMe), 3.49 (3 H, s, OMe), 4.20–4.25 (2 H, m, CHC*H*CH(OMOM)C= and CHC*H*CH(OMOM)CH), 4.26 (1 H, d, *J* 6.6, OC*H*HO), 4.39 (1 H, d, *J* 6.6, OC*H*HO), 4.54 (1 H, d, *J* 9.6, CHC*H*(OMOM)C=), 4.61 (1 H, dd, *J* 4.0 and 9.5 CHC*H*(OMOM)CH), 4.73 (1 H, d, *J* 6.3, OCH*H*O), 4.86 (1 H, d, *J* 6.6, OCH*H*O), 6.63 (1 H, s, C=C*H*Ph), 7.16–7.32 (5 H, m, Ph); dC (67.8 MHz) 15.45 (1 C, CH*Me*), 25.41 (1 C, Me), 25.69 (1 C, Me), 41.37 (1 C, *C*HMe), 55.32 and 55.74 (2 C, 2 x OMe), 71.35, 74.37, 76.35, and 79.74 (4 C, 4 x CHOR), 94.35 and 96.15 (2 C, 2 x O*C*H2O), 111.14 (1 C, *C*Me2), 126.74 (1 C, Ph), 127.88 (2 C, Ph), 128.08 (1 C, Ph), 128.56 (2 C, Ph), 136.64 and 139.11 (2 C, *C*=*C*HPh); *m/z* (CI, NH3), 396 (M + NH4+), [Found: M + NH4+, 396.2383. C21H34O6N requires M + NH4+ 396.2386].

**(1*E*,2*R*,3*S*,4*R*,5*R*,6*S*)-1-Benzylidene-3,4-(isopropylidenedioxy)-2,5-bis(methoxymethoxy)-6-methylcyclohexane (35):** *Rf* = 0.43 in light petroleum/diethyl ether (4:6); [a]D-39.0 (*c* 1.68 in CHCl3); nmax (film)/cm-1 3049, 3012, 2954, 2986, 2879, 2858, 2778, 2358, 2341, 1729, 1669, 1598, 1494, 1461, 1387, 1247, 1214, 1157, 1109, 1039, 945 and 917; dH (270 MHz) (with the help of 2D 1H NMR) 1.14 (3 H, d, *J* 5.3, CHMe), 1.34 (3 H, s, Me), 1.44 (3 H, s, Me), 3.16 (1 H, dq, *J* 10.2 and 5.3, CHC*H*Me), 3.44 (3 H, s, OMe), 3.47 (3 H, s, OMe), 3.60 (1 H, dd, *J* 2.6 and 10.2, CHC*H*(OMOM)CHMe), 4.24 (1 H, m, CHC*H*CH(OMOM)CH), 4.32 (1 H, d, *J* 6.6, OC*H*HO), 4.56 (1 H, dd, *J* 9.9 and 7.3, CHC*H*CH(OMOM)C=), 4.71 (1 H, d, *J* 7.2, OC*H*HO), 4.79 (1 H, d, *J* 9.9, CHC*H*(OMOM)C=), 4.79 (1 H, d, *J* 7.3, OCH*H*O), 4.83 (1 H, d, *J* 7.2, OCH*H*O), 6.56 (1 H, s, C=C*H*Ph), 7.18–7.39 (5 H, m, Ph); dC (67.8 MHz) 17.87 (1 C, CH*Me*), 24.47 (1 C, Me), 25.79 (1 C, Me), 34.54 (1 C, *C*HMe), 55.64 and 55.78 (2 C, 2 x OMe), 72.59, 75.45, 77.47, and 77.89 (4 C, 4 x CHOR), 94.91 and 96.58 (2 C, 2 x O*C*H2O), 110.11 (1 C, *C*Me2), 123.43 (1 C, Ph), 126.39 (2 C, Ph), 128.31 (1 C, Ph), 128.50 (2 C, Ph), 137.65 and 137.43 (2 C, *C*=*C*HPh); *m/z* (CI, NH3), 396 (M + NH4+), [Found: M + NH4+, 396.2378. C21H34O6N requires M + NH4+ 396.2376].

**(1*Z*,2*R*,3*S*,4*R*,5*R*,6*R*)-1-Benzylidene-3,4-(isopropylidenedioxy)-2,5-bis(methoxymethoxy)-6-methylcyclohexane (36):** *Rf* = 0.56 in light petroleum/diethyl ether (4:6); [a]D +28.6 (*c* 1.18 in CHCl3); nmax (film)/cm-1 3057, 3021, 2953, 2923, 2852, 2782, 2341, 1729, 1689, 1653, 1598, 1517, 1461, 1378, 1285, 1258, 1214, 1149, 1118, 1033, 989 and 914; dH (270 MHz) (with the help of 2D 1H NMR) 1.15 (3 H, d, *J* 6.6, CHMe), 1.38 (3 H, s, Me), 1.58 (3 H, s, Me), 3.15 (1 H, dq, *J* 3.4 and 6.6, CHC*H*Me), 3.39 (3 H, s, OMe), 3.43 (3 H, s, OMe), 3.92 (1 H, dd, *J* 3.4 and 5.9, CHC*H*(OMOM)CH), 4.28–4.39 (2 H, m, CHC*H*CH(OMOM)C= and CHC*H*CH(OMOM)CH), 4.52–4.63 (2 x 1H, d, *J* 6.6, OCH*H*O), 4.74 (2 x 1H, d, *J* 6.6, OC*H*HO), 4.76–4.81 (1 H, d, *J* 9.9, CHC*H*(OMOM)C=), 6.71 (1 H, s, C=C*H*Ph), 7.23–7.39 (5 H, m, Ph); dC (67.8 MHz) 14.19 (1 C, CH*Me*), 24.15 (1 C, Me), 25.44 (1 C, Me), 41.78 (1 C, *C*HMe), 55.64 and 55.69 (2 C, 2 x OMe), 71.79, 76.54, 76.09, and 77.44 (4 C, 4 x CHOR), 94.83 and 95.19 (2 C, 2 x O*C*H2O), 110.95 (1 C, *C*Me2), 126.78 (1 C, Ph), 127.29 (2 C, Ph), 128.37 (1 C, Ph), 128.34 (2 C, Ph), 137.67 and 137.74 (2 C, *C*=*C*HPh); *m/z* (CI, NH3), 396 (M + NH4+), [Found: M + NH4+, 396.2384. C21H34O6N requires M + NH4+ 396.2385].

**(1*E*,2*R*,3*S*,4*R*,5*R*,6*R*)-1-Benzylidene-3,4-(isopropylidenedioxy)-2,5-bis(methoxymethoxy)-6-methylcyclohexane (37):** *Rf* = 0.11 in light petroleum/diethyl ether (4:6); [a]D -23.5 (*c* 0.58 in CHCl3); nmax (film)/cm-1 3064, 3032, 2994, 2943, 2924, 2856, 2777, 2344, 1738, 1696, 1658, 1596, 1524, 1467, 1387, 1285, 1258, 1225, 1157, 1114, 1036, 997 and 914; dH (270 MHz) (with the help of 2D 1H NMR) 1.15 (3 H, d, *J* 6.6, CHMe), 1.36 (3 H, s, Me), 1.54 (3 H, s, Me), 3.2 (1 H, dq, *J* 4.2 and 6.6, CHC*H*Me), 3.41 (3 H, s, OMe), 3.46 (3 H, s, OMe), 3.91–3.98 (1 H, dd, *J* 4.2 and 5.9, CHC*H*(OMOM)CH), 4.27–4.37 (2 H, m, CHC*H*CH(OMOM)C= and CHC*H*CH(OMOM)CH), 4.53 (2 x 1H, d, *J* 6.6, OC*H*HO), 4.73 (2 x 1H, d, *J* 6.6, 2 x OC*H*HO), 4.80 (1 H, d, *J* 9.6, CHC*H*(OMOM)C=), 6.72 (1 H, s, C=C*H*Ph), 7.24–7.43 (5 H, m, Ph); dC (67.8 MHz) 14.31 (1 C, CH*Me*), 24.42 (1 C, Me), 25.58 (1 C, Me), 42.18 (1 C, *C*HMe), 55.18 and 55.19 (2 C, 2 x OMe), 71.27, 76.59, 76.76, and 77.75 (4 C, 4 x CHOR), 93.98 and 95.38 (2 C, 2 x O*C*H2O), 110.23 (1 C, *C*Me2), 126.76 (1 C, Ph), 127.38 (2 C, Ph), 128.37 (1 C, Ph), 128.49 (2 C, Ph), 137.73 and 138.12 (2 C, *C*=*C*HPh); *m/z* (CI, NH3), 396 (M + NH4+), [Found: M + NH4+, 396.2388. C21H34O6N requires M + NH4+ 396.2393].

**(2*S*,3*R*,4*R*,5*R*,6*R*)-3,4-(Isopropylidenedioxy)-2,5-bis(methoxymethoxy)-6-phenylcyclohexanone (38):** The alkenes **30** (0.09 g, 0.19 mmol) and **31** (0.045 g, 0.11 mmol) were dissolved in a mixture of DCM (5 ml) and methanol (5 ml). The mixture was cooled to −78 C and ozone was passed for 40 min. The pale blue solution was purged with argon and dimethyl sulfide (2 ml) was added to destroy the ozonide. The reaction mixture was concentrated and the residue was dissolved in DCM (10 ml), washed with water (5 ml). The aqueous layer was further extracted with DCM (2 x 10 ml). The combined organic layers were dried over Na2SO4 and evaporated under reduced pressure. The residue was purified by flash chromatography with light petroleum/ethyl acetate (3:7) as eluent. The title compound was isolated as a colourless oil **38** (0.08 g, 77%).[a]D +28.4 (*c* 0.48 in CHCl3); max(film)/cm-1 3074, 3058, 3023, 2987, 2950, 2923, 2895, 2854, 2838, 1730 (C=O), 1598, 1494, 1455, 1391, 1378, 1253, 1216, 1148, 1107, 1075, 1030 and 918; dH (270 MHz) (with the help of 2D 1H NMR) 1.47 (3 H, s, Me), 1.68 (3 H, s, Me), 3.09 (3 H, s, OMe), 3.24 (3 H, s, OMe), 4.05 (1 H, d, *J* 6.67, OC*H*HO), 4.09 (1 H, d, *J* 10.4, CHC*H*(Ph)C=O), 4.09 (1 H, d, *J* 10.4, CHC*H*(OMOM)C=O), 4.36 (2 x 1H, d, *J* 6.3, OC*H*HO and OCH*H*O), 4.38 (1 H, dd, *J* 4.2 and 10.4, CHC*H*(OMOM)CH(Ph)C=), 4.57 (1 H, d, *J* 6.7, OCH*H*O), 4.67 (1 H, dd, *J* 4.7 and 10.2 CHC*H*CH(OMOM)C=), 4.73 (1 H, dd, *J* 4.4 and 6.6, C*H*OR), 7.26–7.39 (5 H, m, Ph); dC (67.8 MHz) 24.88 (1 C, Me), 25.21 (1 C, Me), 47.29 (1 C, C*H*Ph), 55.49 and 55.39 (2 C, 2 x OMe), 72.65, 74.84, 76.25, and 76.45 (4 C, 4 x CHOR), 93.29 and 96.78 (2 C, 2 x O*C*H2O), 111.09 (1 C, *C*Me2), 126.67 (1 C, Ph), 126.77 (1 C, Ph), 127.28 (2 C, Ph), 129.18 (1 C, Ph), and 136.68 (1 C, Ph), and 205.08 (1 C, *C*=O); *m/z* (CI, NH3), 384 (M + NH4+), [Found: M + NH4+, 384.2024 C19H30O7N requires M + NH4+ 384.2022].

**(2*S*,3*R*,4*R*,5*R*,6*S*)-3,4-(Isopropylidenedioxy)-2,5-bis(methoxymethoxy)-6-phenylcyclohexanone (39):** The alkenes **32** (0.07 g, 0.15 mmol) and **33** (0.04 g, 0.10 mmol) were dissolved in a mixture of DCM (5 ml) and methanol (5 ml). Ozonolysis, conducted as described above, gave the title compound **39** as a colourless oil (0.07 g, 74%). [a]D −38.4 (*c* 0.35 in CHCl3); nmax (film)/cm-1 3069, 3059, 3021, 2986, 2953, 2925, 2895, 2851, 2838, 1729 (C=O), 1598, 1492, 1457, 1391, 1380, 1255, 1218, 1148, 1106, 1075, 1032 and 918; dH (270 MHz) (with the help of 2D 1H NMR) 1.45 (3 H, s, Me), 1.67 (3 H, s, Me), 3.08 (3 H, s, OMe), 3.22 (3 H, s, OMe), 4.06 (1 H, d, *J* 6.7, OC*H*HO), 4.14 (1 H, d, *J* 5.6, CHC*H*(Ph)C= ), 4.17 (1 H, d, *J* 9.8, CHC*H*(OMOM)C=), 4.31 (2 x 1H, d, *J* 6.5, OC*H*HO and OCH*H*O), 4.46 (1 H, dd, *J*4.1 and 5.5, CHC*H*(OMOM)CH(Ph)C=), 4.58 (1 H, d, *J* 6.8, OCH*H*O), 4.70 (1 H, dd, *J* 4.7 and 9.8 CHC*H*CH(OMOM)C=), 4.71 (1 H, dd, *J* 4.5 and 6.6, C*H*OR), 7.23–7.39 (5 H, m, Ph); dC (67.8 MHz) 25.07 (1 C, Me), 25.77 (1 C, Me), 48.29 (1 C, C*H*Ph), 55.49 and 55.70 (2 C, 2 x OMe), 72.81, 75.19, 76.29, and 76.48 (4 C, 4 x CHOR), 94.48 and 96.73 (2 C, 2 x O*C*H2O), 111.09 (1 C, *C*Me2), 126.67 (1 C, Ph), 126.77 (1 C, Ph), 127.28 (2 C, Ph),129.18 (1 C, Ph), 137.18 (1 C, Ph) and 205.24 (1 C, *C*=O); *m/z* (CI, NH3), 384 (M + NH4+), [Found: M + NH4+, 384.2026. C19H30O7N requires M + NH4+ 384.2022].

**(2*S*,3*R*,4*R*,5*R*,6*R*)-3,4-(Isopropylidenedioxy)-2,5-bis(methoxymethoxy)-6-methylcyclohexanone (40):** The alkenes **34** (70 mg, 0.19 mmol) and **35** (60 mg, 0.15 mmol) were dissolved in a mixture of DCM (5 ml) and methanol (5 ml) and cooled to −78 C. Ozone was bubbled through the mixture at −78 C for 40 min. The excess ozone was removed by bubbling argon through the solution. To the resultant pale blue solution dimethyl sulfide (2 ml) was added in order to decompose the ozonide. The reaction mixture was concentrated to afford a residual oil. The latter was dissolved in DCM (10 ml), washed with water (5 ml) and then the aqueous layer was back-extracted with DCM (2 x 10 ml). The organic layers were combined, dried over Na2SO4 and evaporated under reduced pressure. The residue was purified by flash chromatography with light petroleum/ethyl acetate (3:7) as eluent to afford compound **40** (0.08 g, 78%) as a colourless oil; *Rf* = 0.21 in light petroleum/diethyl ether (1:1); [a]D −47.6 (*c* 0.76 in CHCl3); nmax (film)/cm-1 3023, 2989, 2974, 2935, 2890, 2829, 2787, 2368, 2346, 1734 (C=O), 1628, 1459, 1378, 1274, 1214, 1153, 1095, 1037 and 918; dH (270 MHz) (with the help of 2D 1H NMR) 1.23 (3 H, d, *J* 7.2, CHMe), 1.39 (3 H, s, Me), 1.45 (3 H, s, Me), 2.74 (1 H, dq, *J* 10.9 and 7.2, CHC*H*Me), 3.39 (3 H, s, OMe), 3.44 (3 H, s, OMe), 3.76 (1 H, dd, *J* 2.6 and 10.9, CHC*H*(OMOM)CH), 4.1 (1 H, d, *J* 6.6, OC*H*HO), 4.27 (1 H, d, *J* 9.8, CHC*H*(OMOM)C=O), 4.39 (1 H, d, *J* 6.6, OC*H*HO), 4.54–4.63 (2 H, m, CHC*H*CH(OMOM)C=O and CHC*H*CH(OMOM)CH)), 4.68 (1 H, d, *J* 6.6 OCH*H*O), 4.72 (1 H, d, *J* 6.6, OCH*H*O); dC (67.8 MHz) 13.85 (1 C, CH*Me*), 23.61 (1 C, Me), 25.63 (1 C, Me), 43.89 (1 C, *C*HMe), 55.84 and 56.17 (2 C, 2 x OMe), 74.07, 74.47, 74.89, and 75.74 (4 C, 4 x CHOR), 95.89 and 96.23 (2 C, 2 x O*C*H2O), 110.31 (1 C, *C*Me2), 206.65 (1 C, *C*=O); *m/z* (CI, NH3), 322 (M + NH4+), [Found: M + NH4+, 322.1868. C14H28O7N requires M + NH4+ 322.1866].

**(2*S*,3*R*,4*R*,5*R*,6*S*)-3,4-(Isopropylidenedioxy)-2,5-bis(methoxymethoxy)-6-methylcyclohexanone (41):** The alkenes **36** (40 mg, 0.12 mmol) and **37** (30 mg, 0.09 mmol) were dissolved in a mixture of DCM (5 ml) and methanol (5 ml). Ozonolysis, conducted as described above, allowed the title compound **41** to be obtained as a colourless oil (0.05 g, 74%); *Rf* = 0.19 in light petroleum/diethyl ether (1:1); [a]D +24.8 (*c* 0.67 in CHCl3);nmax (film)/cm-1 3037, 3002, 2964, 2935, 2891, 2824, 2773, 2364, 2347, 1735 (C=O), 1628, 1457, 1383, 1276, 1217, 1154, 1096, 1038 and 923; dH (270 MHz) (with the help of 2D 1H NMR) 1.26 (3 H, d, *J* 6.2, CHMe), 1.39 (3 H, s, Me), 1.41 (3 H, s, Me), 2.75 (1 H, dq, *J* 4.7 and 6.3, CHC*H*Me), 3.41 (3 H, s, OMe), 3.45 (3 H, s, OMe), 3.76 (1 H, dd, *J* 2.6 and 4.7, CHC*H*(OMOM)CH), 4.11 (1 H, d, *J* 6.6, OC*H*HO), 4.28 (1 H, d, *J* 9.7, CHC*H*(OMOM)C=O), 4.41 (1 H, d, *J* 6.6, OC*H*HO), 4.54–4.63 (2 H, m, CHC*H*CH(OMOM)C=O and CHC*H*CH(OMOM)CH), 4.67 (1 H, d, *J* 6.6 OCH*H*O), 4.72 (1 H, d, *J* 6.6, OCH*H*O); dC (67.8 MHz) 13.76 (1 C, CH*Me*), 23.75 (1 C, Me), 25.48 (1 C, Me), 44.05 (1 C, *C*HMe), 55.37 and 56.07 (2 C, 2 x OMe), 73.89, 74.74, 74.49, and 75.74 (4 C, 4 x CHOR), 95.79 and 96.57 (2 C, 2 x O*C*H2O), 110.84 (1 C, *C*Me2), 206.11 (1 C,*C*=O); *m/z* (CI, NH3), 322 (M + NH4+), [Found: M + NH4+, 322.1860. C14H28O7N requires M + NH4+ 322.1866].

**(1*Z*,2*S*,3*S*,4*R*,5*R*,6*S*)-1-Benzylidene-3,4-(isopropylidenedioxy)-2,5-bis(methoxymethoxy)-6-phenylcyclohexane (42), (1*E*,2*S*,3*S*,4*R*,5*R*,6*S*)-1-benzylidene-3,4-(isopropylidenedioxy)-2,5-bis(methoxymethoxy)-6-phenylcyclohexane** **(43), (1*Z*,2*S*,3*S*,4*R*,5*R*,6*R*)-1-benzylidene-3,4-(isopropylidenedioxy)-2,5-bis(methoxymethoxy)-6-phenylcyclohexane** **(44), (1*E*,2*S*,3*S*,4*R*,5*R*,6*R*)-1-benzylidene-3,4-(isopropylidenedioxy)-2,5-bis(methoxymethoxy)-6-phenylcyclohexane** **(45):** The iodides **26** (0.60 g, 1.06 mmol) were dissolved in dry benzene (50 ml) and the solution was degassed with argon for 40 min. The solution was heated to reflux at 80 C and a catalytic amount of AIBN was added followed by tributyltin hydride (0.34 g, 0.31 ml, 1.16 mmol). After 3 h at reflux the reaction mixture was cooled to RT and concentrated to afford a residual oil. The product was dissolved in acetonitrile (100 ml), washed with light petroleum (40 ml). The petroleum layer was back-extracted with acetonitrile (2 x 100 ml). The acetonitrile extracts were combined and evaporated under reduced pressure. The residue was purified by flash chromatography with light petroleum/diethyl ether (3:1 to 1:1) as eluent to obtain the title compounds as a colourless oils **42** (0.15 g, 29%), **43** (0.08 g, 17%), **44** (0.11 g, 23%)and **45** (0.07 g, 14%).

**(1*Z*,2*S*,3*S*,4*R*,5*R*,6*S*)-1-Benzylidene-3,4-(isopropylidenedioxy)-2,5-bis(methoxymethoxy)-6-phenylcyclohexane (42):** [a]D −48.6(*c* 1.05 in CHCl3); nmax(film)/cm-1 3073, 3059, 3022, 2985, 2953, 2923, 2895, 2853, 2839, 1735, 1599, 1495, 1457, 1391, 1378, 1253, 1218, 1149, 1109, 1077, 1032 and 918; dH (270 MHz) (with the help of 2D 1H NMR) 1.48 (3 H, s, Me), 1.67 (3 H, s, Me), 3.08 (3 H, s, OMe), 3.23 (3 H, s, OMe), 4.06 (1 H, d, *J* 6.7, OC*H*HO), 4.12 (1 H, d, *J* 9.6, CHC*H*(Ph)C=), ), 4.14 (1 H, d, *J* 4.3, CHC*H*(OMOM)C=), 4.33 (2 x 1H, d, *J* 6.5, OC*H*HO and OCH*H*O), 4.47 (1 H, dd, *J* 4.7 and 9.6, CHC*H*(OMOM)CH(Ph)C=), 4.58 (1 H, d, *J* 6.8, OCH*H*O), 4.67 (1 H, dd, *J* 4.3 and 6.6 CHC*H*CH(OMOM)C=), 4.70 (1 H, dd, *J* 4.3 and 6.6, C*H*OR), 6.45 (1 H, s, C=C*H*Ph), 7.17–7.44 (10 H, m, Ph); dC (67.8 MHz) 25.08 (1 C, Me), 25.72 (1 C, Me), 48.27 (1 C, C*H*Ph), 55.46 and 55.67 (2 C, 2 x OMe), 72.58, 75.02, 76.25, and 76.45 (4 C, 4 x CHOR), 94.27 and 96.45 (2 C, 2 x O*C*H2O), 110.39 (1 C, *C*Me2), 126.67 (1 C, Ph), 126.77 (1 C, Ph), 127.28 (2 C, Ph), 128.51 (2 C, Ph), 128.89 (2 C, Ph), 129.18 (1 C, Ph), 131.73 (2 C, Ph) and 136.66 (1 C, Ph), 137.32 and 141.77 (2 C, *C*=*C*HPh); *m/z* (CI, NH3) 458 (M + NH4+), [Found: M + NH4+, 458.2542. C26H36O6N requires M + NH4+ 458.2543].

**(1*E*,2*S*,3*S*,4*R*,5*R*,6*S*)-1-Benzylidene-3,4-(isopropylidenedioxy)-2,5-bis(methoxymethoxy)-6-phenylcyclohexane (43):** [a]D+28.6(*c* 0.85 in CHCl3); nmax(film)/cm-1 3073, 3059, 3022, 2985, 2953, 2923, 2895, 2853, 2839, 1735, 1599, 1495, 1457, 1391, 1378, 1253, 1218, 1149, 1109, 1077, 1032 and 918; dH (270 MHz) (with the help of 2D 1H NMR) 1.48 (3 H, s, Me), 1.67 (3 H, s, Me), 3.08 (3 H, s, OMe), 3.23 (3 H, s, OMe), 4.06 (1 H, d, *J* 6.7, OC*H*HO), 4.11 (1 H, d, *J* 9.8, CHC*H*(Ph)C=), 4.13 (1 H, d, *J* 4.3, CHC*H*(OMOM)C=), 4.33 (2H, d, *J* 6.5, OC*H*HO and OCH*H*O), 4.47 (1 H, dd, *J* 4.7 and 9.8, CHC*H*(OMOM)CH(Ph)C=), 4.58 (1 H, d, *J* 6.8, OCH*H*O), 4.67 (1 H, dd, *J* 4.3 and 6.6 CHC*H*CH(OMOM)C=), 4.70 (1 H, dd, *J* 4.3 and 6.6, C*H*OR), 6.43 (1 H, s, C=C*H*Ph), 7.17–7.44 (10 H, m, Ph); dC (67.8 MHz) 25.08 (1 C, Me), 25.72 (1 C, Me), 48.27 (1 C, C*H*Ph), 55.46 and 55.67 (2 C, 2 x OMe), 72.58, 75.02, 76.25, and 76.45 (4 C, 4 x CHOR), 94.27 and 96.45 (2 C, 2 x O*C*H2O), 110.39 (1 C, *C*Me2), 126.67 (1 C, Ph), 126.77 (1 C, Ph), 127.28 (2 C, Ph), 128.51 (2 C, Ph), 128.89 (2 C, Ph), 129.18 (1 C, Ph), 131.73 (2 C, Ph) and 136.66 (1 C, Ph), 137.32 and 141.77 (2 C, *C*=*C*HPh); *m/z* (CI, NH3) 458 (M + NH4+), [Found: M + NH4+, 458.2581. C26H36O6N requires M + NH4+ 458.2582].

**(1*Z*,2*S*,3*S*,4*R*,5*R*,6*R*)-1-Benzylidene-3,4-(isopropylidenedioxy)-2,5-bis(methoxymethoxy)-6-phenylcyclohexane (44):** [a]D −47.6(*c* 1.08 in CHCl3); nmax(film)/cm-1 3070, 3059, 3022, 2985, 2953, 2921, 2895, 2853, 2839, 1735, 1599, 1495, 1459, 1391, 1378, 1252, 1219, 1148, 1109, 1077, 1032 and 918; dH (270 MHz) (with the help of 2D 1H NMR) 1.47 (3 H, s, Me), 1.69 (3 H, s, Me), 3.07 (3 H, s, OMe), 3.24 (3 H, s, OMe), 4.07 (1 H, d, *J* 6.7, OC*H*HO), 4.10 (1 H, d, *J* 5.2, CHC*H*(Ph)C=), 4.12 (1 H, d, *J* 4.3, CHC*H*(OMOM)C=), 4.31 (2 x 1H, d, *J* 6.5, OC*H*HO and OCH*H*O), 4.47 (1 H, dd, *J* 3.3 and 5.6, CHC*H*(OMOM)CH(Ph)C=), 4.59 (1 H, d, *J* 6.8, OCH*H*O), 4.67 (1 H, dd, *J* 3.4 and 6.6 CHC*H*CH(OMOM)C=), 4.67 (1 H, dd, *J* 4.3 and 6.6, C*H*OR), 6.43 (1 H, s, C=C*H*Ph), 7.14–7.39 (10 H, m, Ph); dC (67.8 MHz) 25.12 (1 C, Me), 25.69 (1 C, Me), 48.32 (1 C, C*H*Ph), 55.49 and 55.73 (2 C, 2 x OMe), 72.68, 75.12, 76.29, and 76.57 (4 C, 4 x CHOR), 94.78 and 96.89 (2 C, 2 x O*C*H2O), 110.09 (1 C, *C*Me2), 126.69 (1 C, Ph), 126.73 (1 C, Ph), 127.22 (2 C, Ph), 128.58 (2 C, Ph), 128.89 (2 C, Ph), 129.18 (1 C, Ph), 131.74 (2 C, Ph) and 136.66 (1 C, Ph), 137.33 and 141.76 (2 C, *C*=*C*HPh); *m/z* (CI, NH3) 458 (M + NH4+), [Found: M + NH4+, 458.2584. C26H36O6N requires M + NH4+ 458.2585].

**(1*E*,2*S*,3*S*,4*R*,5*R*,6*R*)-1-Benzylidene-3,4-(isopropylidenedioxy)-2,5-bis(methoxymethoxy)-6-phenylcyclohexane (45):** [a]D +32.8(*c* 0.65 in CHCl3); nmax(film)/cm-1 3070, 3059, 3022, 2985, 2953, 2921, 2895, 2853, 2839, 1735, 1599, 1495, 1459, 1391, 1378, 1252, 1219, 1148, 1109, 1077, 1032 and 918; dH (270 MHz) (with the help of 2D 1H NMR) 1.47 (3 H, s, Me), 1.69 (3 H, s, Me), 3.07 (3 H, s, OMe), 3.24 (3 H, s, OMe), 4.07 (1 H, d, *J* 6.7, OC*H*HO), 4.10 (1 H, d, *J* 5.1, CHC*H*(Ph)C=), 4.12 (1 H, d, *J* 4.3, CHC*H*(OMOM)C=), 4.31 (2 x 1H, d, *J* 6.5, OC*H*HO and OCH*H*O), 4.47 (1 H, dd, *J* 3.3 and 5.6, CHC*H*(OMOM)CH(Ph)C=), 4.59 (1 H, d, *J* 6.8, OCH*H*O), 4.67 (1 H, dd, *J* 4.3 and 6.6 CHC*H*CH(OMOM)C=), 4.67 (1 H, dd, *J* 4.3 and 6.6, C*H*OR), 6.43 (1 H, s, C=C*H*Ph), 7.14–7.39 (10 H, m, Ph); dC (67.8 MHz) 25.12 (1 C, Me), 25.69 (1 C, Me), 48.32 (1 C, C*H*Ph), 55.49 and 55.73 (2 C, 2 x OMe), 72.68, 75.12, 76.29, and 76.57 (4 C, 4 x CHOR), 94.78 and 96.89 (2 C, 2 x O*C*H2O), 110.09 (1 C, *C*Me2), 126.69 (1 C, Ph), 126.73 (1 C, Ph), 127.22 (2 C, Ph), 128.58 (2 C, Ph), 128.89 (2 C, Ph), 129.18 (1 C, Ph), 131.74 (2 C, Ph) and 136.66 (1 C, Ph), 137.33 and 141.76 (2 C, *C*=*C*HPh); *m/z* (CI, NH3) 458 (M + NH4+), [Found: M + NH4+, 458.2543. C26H36O6N requires M + NH4+ 458.2543].

**(1*Z*,2*S*,3*S*,4*R*,5*R*,6*S*)-1-Benzylidene-3,4-(isopropylidenedioxy)-2,5-bis(methoxymethoxy)-6-methylcyclohexane (46), (1*E*,2*S*,3*S*,4*R*,5*R*,6*S*)-1-benzylidene-3,4-(isopropylidenedioxy)-2,5-bis(methoxymethoxy)-6-methylcyclohexane (47), (1*Z*,2*S*,3*S*,4*R*,5*R*,6*R*)-1-benzylidene-3,4-(isopropylidenedioxy)-2,5-bis(methoxymethoxy)-6-methylcyclohexane (48), (1*E*,2*S*,3*S*,4*R*,5*R*,6*R*)-1-benzylidene-3,4-(isopropylidenedioxy)-2,5-bis(methoxymethoxy)-6-methylcyclohexane (49):** The iodides **28** (0.85 g, 1.68 mmol) were dissolved in dry benzene (50 ml) and the solution was degassed by bubbling argon through the solution for 40 min. The solution was heated to reflux and a catalytic amount of AIBN was added. Tributyltin hydride (0.54 g, 0.50 ml, 1.85 mmol) was added dropwise to the reaction mixture over 30 min. After a further 3 h under reflux the reaction mixture was concentrated to afford a residue. The latter was dissolved in acetonitrile (100 ml), washed with light petroleum (40 ml). The petroleum layer was extracted with acetonitrile (2 x 100 ml). The layers of acetonitrile were combined and evaporated under reduced pressure. The residue was purified by flash chromatography with light petroleum/diethyl ether (4:1 to 1:1) as eluent to obtain the title compounds as colourless oils **46** (0.21 g, 33%), **47** (0.12 g, 19%), **48** (0.17 g, 26%) and **49** (0.09 g, 14%).

**(1*Z*,2*S*,3*S*,4*R*,5*R*,6*S*)-1-Benzylidene-3,4-(isopropylidenedioxy)-2,5-bis(methoxymethoxy)-6-methylcyclohexane (46):** *Rf* = 0.68 in light petroleum/diethyl ether (4:6); [a]D −46.9 (*c* 2.48 in CHCl3); nmax (film)/cm-1 3058, 3021, 2983, 2931, 2854, 2825, 2780, 2252, 1725, 1600, 1492, 1461, 1378, 1247, 1214, 1147, 1101, 1070, 1033 and 998; dH (270 MHz) (with the help of 2D 1H NMR) 1.27 (3 H, d, *J* 6.6, CHMe), 1.40 (3 H, s, Me), 1.62 (3 H, s, Me), 3.06 (1 H, dq, *J* 10.5 and 6.6, CHC*H*Me), 3.22 (3 H, s, OMe), 3.46 (3 H, s, OMe), 4.20–4.25 (2 H, m, CHC*H*CH(OMOM)C= and CHC*H*CH(OMOM)CH), 4.25 (1 H, d, *J* 6.6, OC*H*HO), 4.4 (1 H, d, *J* 6.6, OC*H*HO), 4.54 (1 H, d, *J* 4.6, CHC*H*(OMOM)C=), 4.61 (1 H, dd, *J* 4.0 and 5.9 CHC*H*(OMOM)CH), 4.74 (1 H, d, *J* 6.3, OCH*H*O), 4.86 (1 H, d, *J* 6.6, OCH*H*O), 6.60 (1 H, s, C=C*H*Ph), 7.17–7.31 (5 H, m, Ph); dC (67.8 MHz) 15.40 (1 C, CH*Me*), 25.39 (1 C, Me), 25.60 (1 C, Me), 40.77 (1 C, *C*HMe), 55.30 and 55.67 (2 C, 2 x OMe), 70.65, 74.73, 76.02, and 79.71 (4 C, 4 x CHOR), 94.31 and 96.59 (2 C, 2 x O*C*H2O), 110.10 (1 C, *C*Me2), 126.74 (1 C, Ph), 127.88 (2 C, Ph), 128.08 (1 C, Ph), 128.56 (2 C, Ph), 136.64 and 139.11 (2 C, *C*=*C*HPh); *m/z* (CI, NH3), 396 (M + NH4+), [Found: M + NH4+, 396.2386. C21H34O6N requires M + NH4+ 396.2386].

**(1*E*,2*S*,3*S*,4*R*,5*R*,6*S*)-1-Benzylidene-3,4-(isopropylidenedioxy)-2,5-bis(methoxymethoxy)-6-methylcyclohexane (47):** *Rf* = 0.40 in light petroleum/diethyl ether (4:6); [a]D +46.9 (*c* 2.48 in CHCl3); nmax (film)/cm-1 3055, 3018, 2954, 2987, 2873, 2854, 2778, 2358, 2341, 1725, 1652, 1598, 1494, 1461, 1380, 1249, 1214, 1151, 1103, 1037, 948 and 916; dH (270 MHz) (with the help of 2D 1H NMR) 1.14 (3 H, d, *J* 5.3, CHMe), 1.35 (3 H, s, Me), 1.43 (3 H, s, Me), 3.17 (1 H, dq, *J* 9.3 and 5.3, CHC*H*Me), 3.44 (3 H, s, OMe), 3.46 (3 H, s, OMe), 3.62 (1 H, dd, *J* 2.6 and 9.2, CHC*H*(OMOM)CHMe), 4.24–4.28 (1 H, m, CHC*H*CH(OMOM)CH), 4.31 (1 H, d, *J* 6.6, OC*H*HO), 4.56 (1 H, dd, *J* 4.0 and 7.3, CHC*H*CH(OMOM)C=), 4.71 (1 H, d, *J* 7.2, OC*H*HO), 4.76 (1 H, d, *J* 3.3, CHC*H*(OMOM)C=), 4.79 (1 H, d, *J* 7.3, OCH*H*O), 4.82 (1 H, d, *J* 7.3, OCH*H*O), 6.50 (1 H, s, C=C*H*Ph), 7.19–7.38 (5 H, m, Ph); dC (67.8 MHz) 17.87 (1 C, CH*Me*), 24.42 (1 C, Me), 25.78 (1 C, Me), 34.54 (1 C, *C*HMe), 55.64 and 55.68 (2 C, 2 x OMe), 72.28, 75.04, 77.47, and 77.94 (4 C, 4 x CHOR), 94.95 and 96.50 (2 C, 2 x O*C*H2O), 110.11 (1 C, *C*Me2), 123.43 (1 C, Ph), 126.39 (2 C, Ph), 128.31 (1 C, Ph), 128.50 (2 C, Ph), 137.00 and 137.38 (2 C, *C*=*C*HPh); *m/z* (CI, NH3), 396 (M + NH4+), [Found: M + NH4+, 496.2384. C21H34O6N requires M + NH4+ 396.2388].

**(1*Z*,2*S*,3*S*,4*R*,5*R*,6*R*)-1-Benzylidene-3,4-(isopropylidenedioxy)-2,5-bis(methoxymethoxy)-6-methylcyclohexane (48):** *Rf* = 0.52 in light petroleum/diethyl ether (4:6); [a]D −24.3 (*c* 0.97 in CHCl3); nmax (film)/cm-1 3056, 3022, 2954, 2923, 2852, 2782, 2341, 1729, 1691, 1650, 1598, 1515, 1461, 1378, 1282, 1255, 1214, 1149, 1108, 1033, 995 and 917; dH (270 MHz) (with the help of 2D 1H NMR) 1.15 (3 H, d, *J* 6.6, CHMe), 1.38 (3 H, s, Me), 1.58 (3 H, s, Me), 3.16 (1 H, dq, *J* 3.3 and 6.6, CHC*H*Me), 3.41 (3 H, s, OMe), 3.45 (3 H, s, OMe), 3.94 (1 H, dd, *J* 3.3 and 5.9, CHC*H*(OMOM)CH), 4.28–4.37 (2 H, m, CHC*H*CH(OMOM)C= and CHC*H*CH(OMOM)CH), 4.56 (2 x 1H, d, *J* 6.6, OC*H*HO), 4.74 (2 x 1H, d, *J* 6.6, OC*H*HO), 4.77 (1 H, d, *J* 4.6, CHC*H*(OMOM)C=), 6.72 (1 H, s, C=C*H*Ph), 7.21–7.35 (5 H, m, Ph); dC (67.8 MHz) 14.21 (1 C, CH*Me*), 24.10 (1 C, Me), 25.48 (1 C, Me), 41.76 (1 C, *C*HMe), 55.62 and 55.71 (2 C, 2 x OMe), 71.79, 76.53, 76.08, and 77.47 (4 C, 4 x CHOR), 94.83 and 95.18 (2 C, 2 x O*C*H2O), 110.11 (1 C, *C*Me2), 126.70 (1 C, Ph), 127.27 (2 C, Ph), 128.30 (1 C, Ph), 128.40 (2 C, Ph), 137.69 and 137.89 (2 C, *C*=*C*HPh); *m/z* (CI, NH3), 396 (M + NH4+), [Found: M + NH4+, 496.2377. C21H34O6N requires M + NH4+ 396.2379].

**(1*E*,2*S*,3*S*,4*R*,5*R*,6*R*)-1-Benzylidene-3,4-(isopropylidenedioxy)-2,5-bis(methoxymethoxy)-6-methylcyclohexane (49):** *Rf* = 0.08 in light petroleum/diethyl ether (4:6); [a]D +18.4 (*c* 0.65 in CHCl3); nmax (film)/cm-1 3058, 3025, 2989, 2944, 2923, 2855, 2776, 2344, 1734, 1689, 1650, 1595, 1515, 1464, 1377, 1284, 1255, 1214, 1149, 1114, 1031, 990 and 916; dH (270 MHz) (with the help of 2D 1H NMR) 1.14 (3 H, d, *J* 6.7, CHMe), 1.37 (3 H, s, Me), 1.55 (3 H, s, Me), 3.2 (1 H, dq, *J* 3.8 and 6.6, CHC*H*Me), 3.42 (3 H, s, OMe), 3.47 (3 H, s, OMe), 3.94 (1 H, dd, *J* 3.7 and 5.9, CHC*H*(OMOM)CH), 4.25–4.34 (2 H, m, CHC*H*CH(OMOM)C= and CHC*H*CH(OMOM)CH), 4.53 (2 x 1H, d, *J* 6.6, OC*H*HO), 4.75 (2 x 1H, d, *J* 6.6, OC*H*HO), 4.80 (1 H, d, *J* 4.6, CHC*H*(OMOM)C=), 6.74 (1 H, s, C=C*H*Ph), 7.23–7.41 (5 H, m, Ph); dC (67.8 MHz) 14.29 (1 C, CH*Me*), 24.13 (1 C, Me), 25.68 (1 C, Me), 41.86 (1 C, *C*HMe), 55.68 and 55.76 (2 C, 2 x OMe), 71.82, 76.65, 76.88, and 77.87 (4 C, 4 x CHOR), 94.58 and 95.26 (2 C, 2 x O*C*H2O), 110.17 (1 C, *C*Me2), 126.75 (1 C, Ph), 127.28 (2 C, Ph), 128.35 (1 C, Ph), 128.44 (2 C, Ph), 137.70 and 137.93 (2 C, *C*=*C*HPh); *m/z* (CI, NH3), 396 (M + NH4+), [Found: M + NH4+, 396.2384. C21H34O6N requires M + NH4+ 396.2386].

**(2*R*,3*R*,4*R*,5*R*,6*R*)-3,4-(Isopropylidenedioxy)-2,5-bis(methoxymethoxy)-6-phenylcyclohexanone (50):** The alkenes **42** (0.13 g, 0.29 mmol)and **43** (0.07 g, 0.16 mmol) were dissolved in a mixture of DCM (5 ml) and methanol (5 ml) and cooled to −78 C. Ozonolysis of the resultant solution was carried out for 40 min at which point a persistent blue colour was observed. The excess ozone was then removed by bubbling argon through the solution. The ozonide was destroyed *via* the addition of dimethyl sulfide (2 ml). The reaction mixture was concentrated to leave the residue, which was dissolved in DCM (10 ml), washed with water (5 ml). The aqueous layer was further extracted with DCM (2 x 10 ml). The organic layers were combined, dried over Na2SO4 and evaporated under reduced pressure. The residue was purified by flash chromatography with light petroleum/ethyl acetate (3:7) as eluent, to give **50** as a colourless oil (0.13 g, 76%). [a]D +14.8 (*c* 0.6 in CHCl3); nmax(film)/cm-1 3073, 3059, 3022, 2985, 2953, 2923, 2895, 2853, 2839, 1739 (C=O), 1599, 1495, 1457, 1391, 1378, 1253, 1218, 1149, 1109, 1077, 1032 and 919; dH (270 MHz) (with the help of 2D 1H NMR) 1.46 (3 H, s, Me), 1.65 (3 H, s, Me), 3.09 (3 H, s, OMe), 3.22 (3 H, s, OMe), 4.06 (1 H, d, *J* 6.64, OC*H*HO), 4.12 (1 H, d, *J* 9.7, CHC*H*(Ph)C=), 4.13 (1 H, d, *J* 4.3, CHC*H*(OMOM)C=), 4.32 (2 x 1H, d, *J* 6.5, OC*H*HO and OCH*H*O), 4.47 (1 H, dd, *J* 4.7 and 9.6, CHC*H*(OMOM)CH(Ph)C=), 4.58 (1 H, d, *J* 6.8, OCH*H*O), 4.67 (1 H, dd, *J* 4.3 and 6.6 CHC*H*CH(OMOM)C=), 4.70 (1 H, dd, *J* 4.3 and 6.6, C*H*OR), 7.27–7.39 (5 H, m, Ph); dC (67.8 MHz) 25.08 (1 C, Me), 25.72 (1 C, Me), 48.27 (1 C, C*H*Ph), 55.49 and 55.77 (2 C, 2 x OMe), 72.58, 75.02, 76.25, and 76.45 (4 C, 4 x CHOR), 94.25 and 96.38 (2 C, 2 x O*C*H2O), 110.57 (1 C, *C*Me2), 126.67 (1 C, Ph), 126.77 (1 C, Ph), 127.28 (2 C, Ph), 129.18 (1 C, Ph), 136.66 (1 C, Ph), and 203.14 (1 C, *C*=O); *m/z* (CI, NH3), 384 (M + NH4+), [Found: M + NH4+, 384.2024. C19H30O7N requires M + NH4+ 384.2022].

**(2*R*,3*R*,4*R*,5*R*,6*S*)-3,4-(Isopropylidenedioxy)-2,5-bis(methoxymethoxy)-6-phenylcyclohexanone (51):** The alkenes **44** (0.10 g, 0.22 mmol) and **45** (0.05 g, 0.12 mmol) were dissolved in a mixture of DCM (5 ml) and methanol (5 ml). Application of the procedure used for the preparation of **50** enabled the title compound **51** to be obtained as a colourless oil (0.10 g, 78%). [a]D −12.4(*c* 0.5 in CHCl3); max(film)/cm-1 3070, 3059, 3022, 2985, 2953, 2921, 2895, 2853, 2839, 1737 (C=O), 1599, 1495, 1391, 1378, 1252, 1217, 1148, 1077, 1032 and 918; dH (270 MHz) (with the help of 2D 1H NMR) 1.49 (3 H, s, Me), 1.72 (3 H, s, Me), 3.05 (3 H, s, OMe), 3.23 (3 H, s, OMe), 4.09 (1 H, d, *J* 6.7, OC*H*HO), 4.11 (1 H, d, *J* 5.1, CHC*H*(Ph)C=), 4.14 (1 H, d, *J* 4.33, CHC*H*(OMOM)C=), 4.33 (2 x 1H, d, *J* 6.5, OC*H*HO and OCH*H*O), 4.47 (1 H, dd, *J* 3.3 and 5.4, CHC*H*(OMOM)CH(Ph)C=), 4.61 (1 H, d, *J* 6.7, OCH*H*O), 4.66 (1 H, dd, *J* 4.3 and 6.6 CHC*H*CH(OMOM)C=), 4.70 (1 H, dd, *J* 4.3 and 6.6, C*H*OR), 7.27–7.39 (5 H, m, Ph); dC (67.8 MHz) 25.12 (1 C, Me), 25.69 (1 C, Me), 48.32 (1 C, C*H*Ph), 55.49 and 55.73 (2 C, 2 x OMe), 72.68, 75.12, 76.29, and 76.57 (4 C, 4 x CHOR), 94.78 and 96.89 (2 C, 2 x O*C*H2O), 110.79 (1 C, *C*Me2), 126.69 (1 C, Ph), 126.73 (1 C, Ph), 127.22 (2 C, Ph), 131.74 (1 C, Ph) and 136.66 (1 C, Ph), and 204.67(1 C, *C*=O); *m/z* (CI, NH3), 384 (M + NH4+), [Found: M + NH4+, 384.2744. C19H30O7N requires M + NH4+ 384.2746].

**(2*R*,3*R*,4*R*,5*R*,6*R*)-3,4-(Isopropylidenedioxy)-2,5-bis(methoxymethoxy)-6-methylcyclohexanone (52):** The alkenes **46** (0.19 g, 0.49 mmol) and **47** (0.14 g, 0.39 mmol) were dissolved in a mixture of DCM (5 ml) and methanol (5 ml). Employing the same procedure as that used for the preparation of **50** allowed the title compound to be obtained as a colourless oil (0.19 g, 71%); *Rf* = 0.2 in light petroleum/diethyl ether (1:1); [a]D +55.8 (*c* 0.43 in CHCl3); nmax(film)/cm-1 3019, 2994, 2973, 2935, 2900, 2827, 2778, 2360, 2341, 1737 (C=O), 1623, 1455, 1384, 1276, 1214, 1153, 1095, 1033 and 917; dH (270 MHz) (with the help of 2D 1H NMR) 1.24 (3 H, d, *J* 7.3, CHMe), 1.37 (3 H, s, Me), 1.44 (3 H, s, Me), 2.72 (1 H, dq, *J* 11.2 and 7.3, CHC*H*Me), 3.41 (3 H, s, OMe), 3.45 (3 H, s, OMe), 3.78 (1 H, dd, *J* 2.6 and 11.2, CHC*H*(OMOM)CH), 4.1 (1 H, d, *J* 6.6, OC*H*HO), 4.27 (1 H, d, *J* 3.3, CHC*H*(OMOM)C=O), 4.41 (1 H, d, *J* 6.6, OC*H*HO), 4.53–4.62 (2 H, m, CHC*H*CH(OMOM)C=O and CHC*H*CH(OMOM)CH), 4.69 (1 H, d, *J* 6.6 OCH*H*O), 4.74 (1 H, d, *J* 6.6, OCH*H*O); dC (67.8 MHz) 13.88 (1 C, CH*Me*), 23.64 (1 C, Me), 25.60 (1 C, Me), 43.91 (1 C, *C*HMe), 55.86 and 55.97 (2 C, 2 x OMe), 73.87, 74.41, 74.84, and 75.65 (4 C, 4 x CHOR), 95.94 and 96.12 (2 C, 2 x O*C*H2O), 110.08 (1 C, *C*Me2), 206.07 (1 C, *C*=O); *m/z* (CI, NH3), 322 (M + NH4+), [Found: M + NH4+, 322.1866. C14H28O7N requires M + NH4+ 322.1866].

**(2*R*,3*R*,4*R*,5*R*,6*S*)-3,4-(Isopropylidenedioxy)-2,5-bis(methoxymethoxy)-6-methylcyclohexanone (53):** The alkenes **48** (0.12 g, 0.30 mmol) and **49** (0.07 g, 0.20 mmol) were dissolved in a mixture of DCM (5 ml) and methanol (5 ml). Employing the same procedure as that used for the preparation of **50** allowed the title compound **53** to be obtained as a colourless oil (0.12 g, 76%); *Rf* = 0.17 in light petroleum/diethyl ether (1:1); [a]D −27.3(*c* 0.68 in CHCl3); nmax(film)/cm-1 3018, 2996, 2973, 2937, 2892, 2823, 2775, 2363, 2342, 1735 (C=O), 1626, 1454, 1387, 1274, 1216, 1154, 1096, 1038 and 921; dH (270 MHz) (with the help of 2D 1H NMR) 1.25 (3 H, d, *J* 6.2, CHMe), 1.38 (3 H, s, Me), 1.43 (3 H, s, Me), 2.69 (1 H, dq, *J* 4.6 and 6.2, CHC*H*Me), 3.41 (3 H, s, OMe), 3.45 (3 H, s, OMe), 3.76 (1 H, dd, *J* 2.6 and 4.6, CHC*H*(OMOM)CH), 4.11 (1 H, d, *J* 6.6, OC*H*HO), 4.28 (1 H, d, *J* 3.5, CHC*H*(OMOM)C=O), 4.41 (1 H, d, *J* 6.6, OC*H*HO), 4.54–4.63 (2 H, m, CHC*H*CH(OMOM)C=O and CHC*H*CH(OMOM)CH), 4.67 (1 H, d, *J* 6.6 OCH*H*O), 4.73 (1 H, d, *J* 6.6, OCH*H*O); dC (67.8 MHz) 13.87 (1 C, CH*Me*), 23.58 (1 C, Me), 25.64 (1 C, Me), 43.95 (1 C, *C*HMe), 55.83 and 55.97 (2 C, 2 x OMe), 73.79, 74.37, 74.95, and 75.69 (4 C, 4 x CHOR), 95.76 and 96.14 (2 C, 2 x O*C*H2O), 110.23 (1 C, *C*Me2), 206.11 (1 C,*C*=O); *m/z* (CI, NH3), 322 (M + NH4+), [Found: M + NH4+, 322.1858. C14H28O7N requires M + NH4+ 322.1866].

**Methoxymethyl 2,3-*O*-isopropylidene-5a-carba-β-d-rhamnopyranoside (54):** In a dry round bottom flask, (3*S*,4*R*,5*R*)-3,4-(isopropylidenedioxy)-5-(methoxymethoxy)-1-methylcyclohexene (**14**) (0.288 g, 1.0 mmol) was dissolved in dry THF (15 ml) and placed at 0 C. Borane-methylsulphide complex (2 M in THF, 0.6 ml, 1.2 mmol) was added dropwise and the reaction mixture was stirred at room temperature for 2 h. After this time elapsed, water (1 ml) was added, followed by aqueous sodium hydroxide (2 M in water, 0.9 ml, 1.8 mmol) and hydrogen peroxide (27%, 4.8 mmol). During this time the flask was cooled in an ice-water bath. After stirring at room temperature overnight, a further amount of sodium hydroxide (2 M in water, 20 ml) was added with water (10 ml) and the reaction mixture was extracted with ethyl acetate (3 x 50 ml). The organic extracts were combined, dried over Na2SO4 and the solvent removed under reduced pressure to give the crude product which was purified by flash chromatography on silica gel with light petroleum/diethyl ether (3:1 to 1:4) to yield the title compound **54** (0.19 g, 77%) as a colourless oil, []D −27.0 (*c* 1.65 in CHCl3); max(film)/cm-1 3467 (OH), 2985, 2935, 2892, 1727, 1639, 1454, 1380, 1218, 1145, 1106, 1037, 917, 863 and 790; H (270 MHz) 1.06 (3 H, d, *J* 5.94, CHC*H3*), 1.40 (3 H, s, Me), 1.56 (3 H, s, Me), 1.59–1.64 (1 H, d, *J* 12.53, CH*H*CHCH3), 1.77–1.84 (1 H, dt, *J* 3.3 and 12.54, C*H*HCHCH3), 2.58 (1 H, bs, C*H*CH3), 3.27–3.34 (1 H, dd, *J* 7.26, 7.91 and 10.56, 11.22, C*H*OH), 3.41 (3 H, s, OMe), 3.84–3.89 (2 H, dd, *J* 5.28 and 7.25, C*H*CHOH and C*H*CHOMOM), 4.41 (1 H, t, *J* 3.96, C*H*OMOM), 4.73 (1 H, d, *J* 7.25, OC*H*HO), 4.77 (1 H, d, *J* 7.26, OCH*H*O); C (67.8 MHz) 26.30 (1 C, CH*C*H3), 28.37 (1 C, Me), 29.62 (1 C, Me), 32.81 (1 C, *C*HCH3), 32.98 (1 C, CH2), 55.43 (1 C, OMe), 72.93, 76.13 and 77.93 (3 C, 3 x CHOR), 82.01 (1 C, CHOH), 95.39 (1 C, OCH2O), 109.85 (1 C, *C*Me2); *m/z* (EI) 247 (MH+) and 215. [Found: MH+ 247.1545. C12H23O5 requires 247.1545].

**5a-Carba-β-d-rhamnopyranose (55):** Methoxymethyl 2,3-*O*-isopropylidene-5a-carba-β-d-rhamnopyranoside(**54**)(0.048 g, 0.194 mmol) was dissolved in methanol (2 ml) and a solution of HCl (6 N in water, 1 ml) was added at room temperature. After 12 h, the solvents were evaporated and the crude crystals of **55** (0.034 g, 99%) obtained were directly analysed, []D +7.0 (*c* 1.1 in CH3OH); mp 166–167 C; H (270 MHz, CD3OD) 1.04 (3 H, d, *J* 6.6, Me), 1.37 (1 H, bm, C*H*Me), 1.59 (2 H, m, *J* 3.3 and 10.56, C*H2*), 3.26–3.36 (2 H, bm, *J* 10.55, C*H*OHCH2 and C*H*OH), 3.64 (1 H, bm, C*H*OH), 3.98 (1 H, bs, C*H*OH); C (67.8 MHz) 18.36 (1 C, Me), 35.26 (1 C, CH2), 36.38 (1 C, *C*HMe), 70.76, 75.03, 76.16 and 76.39 (4 C, 4 x CHOH); *m/z* (CI, NH3) 180 (M + NH4+), 162 (M+). [Found: M + NH4+ 180.1238. C7H18O4N requires 180.1236].

**2,3,4,5-Tetra-*O*-acetyl-5a-carba-β-d-rhamnopyranose (56):** 5a-Carba-β-d-rhamnopyranose(**55**)(0.034 g, 0.21 mmol) was dissolved in dry pyridine (1 ml). Acetic anhydride (1 ml) was added at room temperature. After 12 h, the solvents were evaporated and the crude product **56** was purified by flash chromatography on silica gel with light petroleum/diethyl ether (1:1) as eluent to yield the title compound **56** (0.049 g, 99%) as a colourless oil, []D +13 (*c* 1.65 in CHCl3); H (400.1 MHz) (with the help of 400 COSY) 0.99 (3 H, d, *J* 6.05, Me), 1.70–1.75 (1 H, t, *J* 12, C*H*H), 1.73 (1 H, m, *J*3.5, C*H*Me), 1.83–1.88 (1 H, m, CH*H*), 1.98*,* 2.00, 2.05 and 2.17 (12 H, 4s, 4 x OC*Me*), 4.92 (1 H, dd, *J* 2.8 and 10.2, C*H*(OAc)CH(OAc)CHMe), 4.94 (1 H, ddd, *J* 2.7, 4.8 and 11.66, C*H*OAcCH2), 5.02 (1 H, t, *J* 10.1, C*H*OAcCHMe), 5.55 (1 H, dt, *J* 1.4, 2.73, C*H*OAcCHOAcCH2); C (100.6 MHz) (with the help of DEPT and a 400.1 1H-13C NMR) 16.4 (1 C, Me), 19.62, 19.78, 19.83 and 19.89 (4 C, 4 x OC*Me*), 30.97 (1 C, *C*HMe), 31.32 (1 C, *C*H2), 67.71 (1 C, *C*HOAcCH2), 69.04 (1 C, *C*HOAcCHOAcCH2), 70.73 (1 C, *C*HOAcCHOAcCHMe), 72.54 (1 C, *C*HOACCHMe), 168.87, 168.8, 169.14 and 169.47 (4 C, 4 x C=O); *m/z* (CI, NH3) 348 (M + NH4+), 230, 153 and 77. [Found: M + NH4+ 348.1658. C15H26O8N requires 348.1658].
